# **Multi-ancestry GWAS of the electrocardiographic PR interval identifies 210 loci underlying cardiac conduction**

Ioanna Ntalla<sup>1\*</sup>, Lu-Chen Weng<sup>2, 3\*</sup>, James H. Cartwright<sup>1</sup>, Amelia Weber Hall<sup>2, 3</sup>, Gardar Sveinbjornsson<sup>4</sup>, Nathan R. Tucker<sup>2, 3</sup>, Seung Hoan Choi<sup>3</sup>, Mark D. Chaffin<sup>3</sup>, Carolina Roselli<sup>3, 5</sup>, Michael R. Barnes<sup>1, 6</sup>, Borbala Mifsud<sup>1, 7</sup>, Helen R. Warren<sup>1, 6</sup>, Caroline Hayward<sup>8</sup>, Jonathan Marten<sup>8</sup>, James J. Cranley<sup>1</sup>, Maria Pina Concas<sup>9</sup>, Paolo Gasparini<sup>9, 10</sup>, Thibaud Boutin<sup>8</sup>, Ivana Kolcic<sup>11</sup>, Ozren Polasek<sup>11-13</sup>, Igor Rudan<sup>14</sup>, Nathalia M. Araujo<sup>15</sup>, Maria Fernanda Lima-Costa<sup>16</sup>, Antonio Luiz P. Ribeiro<sup>17</sup>, Renan P. Souza<sup>15</sup>, Eduardo Tarazona-Santos<sup>15</sup>, Vilmantas Giedraitis<sup>18</sup>, Erik Ingelsson<sup>19-22</sup>, Anubha Mahajan<sup>23</sup>, Andrew P. Morris<sup>23-25</sup>, Fabiola Del Greco M.<sup>26</sup>, Luisa Foco<sup>26</sup>, Martin Gögele<sup>26</sup>, Andrew A. Hicks<sup>26</sup>, James P. Cook<sup>24</sup>, Lars Lind<sup>27</sup>, Cecilia M. Lindgren<sup>28-30</sup>, Johan Sundström<sup>31</sup>, Christopher P. Nelson<sup>32, 33</sup>, Muhammad B. Riaz<sup>32, 33</sup>, Nilesh J. Samani<sup>32, 33</sup>, Gianfranco Sinagra<sup>34</sup>, Sheila Ulivi<sup>9</sup>, Mika Kähönen<sup>35, 36</sup>, Pashupati P. Mishra<sup>37, 38</sup>, Nina Mononen<sup>37, 38</sup>, Kjell Nikus<sup>39, 40</sup>, Mark J. Caulfield<sup>1, 6</sup>, Anna Dominiczak<sup>41</sup>, Sandosh Padmanabhan<sup>41, 42</sup>, May E. Montasser<sup>43, 44</sup>, Jeff R. O'Connell<sup>43, 44</sup>, Kathleen Ryan<sup>43, 44</sup>, Alan R. Shuldiner<sup>43, 44</sup>, Stefanie Aeschbacher<sup>45</sup>, David Conen<sup>45, 46</sup>, Lorenz Risch<sup>47-49</sup>, Sébastien Thériault<sup>46, 50</sup>, Nina Hutri-Kähönen<sup>51, 52</sup>, Terho Lehtimäki<sup>37, 38</sup>, Leo-Pekka Lyytikäinen<sup>37-39</sup>, Olli T. Raitakari<sup>53-55</sup>, Catriona L. K. Barnes<sup>14</sup>, Harry Campbell<sup>14</sup>, Peter K. Joshi<sup>14</sup>, James F. Wilson<sup>8, 14</sup>, Aaron Isaacs<sup>56</sup>, Jan A. Kors<sup>57</sup>, Cornelia M. van Duijn<sup>58</sup>, Paul L. Huang<sup>2</sup>, Vilmundur Gudnason<sup>59, 60</sup>, Tamara B. Harris<sup>61</sup>, Lenore J. Launer<sup>61</sup>, Albert V. Smith<sup>59, 62</sup>, Erwin P. Bottinger<sup>63</sup>, Ruth J. F. Loos<sup>63, 64</sup>, Girish N. Nadkarni<sup>63</sup>, Michael H. Preuss<sup>63</sup>, Adolfo Correa<sup>65</sup>, Hao Mei<sup>66</sup>, James Wilson<sup>67</sup>, Thomas Meitinger<sup>68-70</sup>, Martina Müller-Nurasyid<sup>68, 71-73</sup>, Annette Peters<sup>68, 74, 75</sup>, Melanie Waldenberger<sup>68, 75, 76</sup>, Massimo Mangino<sup>77, 78</sup>, Timothy D. Spector<sup>77</sup>, Michiel Rienstra<sup>5</sup>, Yordi J.

24 van de Vegte<sup>5</sup>, Pim van der Harst<sup>5</sup>, Niek Verweij<sup>5, 79</sup>, Stefan Kääb<sup>68, 73</sup>, Katharina Schramm<sup>68, 71,</sup>  
25 <sup>73</sup>, Moritz F. Sinner<sup>68, 73</sup>, Konstantin Strauch<sup>71, 72</sup>, Michael J. Cutler<sup>80</sup>, Diane Fatkin<sup>81-83</sup>, Barry  
26 London<sup>84</sup>, Morten Olesen<sup>85, 86</sup>, Dan M. Roden<sup>87</sup>, M. Benjamin Shoemaker<sup>88</sup>, J. Gustav Smith<sup>89</sup>,  
27 Mary L. Biggs<sup>90, 91</sup>, Joshua C. Bis<sup>90</sup>, Jennifer A. Brody<sup>90</sup>, Bruce M. Psaty<sup>90, 92, 93</sup>, Ken Rice<sup>91</sup>, Nona  
28 Sotoodehnia<sup>90, 92, 94</sup>, Alessandro De Grandi<sup>26</sup>, Christian Fuchsberger<sup>26</sup>, Cristian Pattaro<sup>26</sup>, Peter P.  
29 Pramstaller<sup>26</sup>, Ian Ford<sup>95</sup>, J. Wouter Jukema<sup>96, 97</sup>, Peter W. Macfarlane<sup>98</sup>, Stella Trompet<sup>99</sup>, Marcus  
30 Dörr<sup>100, 101</sup>, Stephan B. Felix<sup>100, 101</sup>, Uwe Völker<sup>100, 102</sup>, Stefan Weiss<sup>100, 102</sup>, Aki S. Havulinna<sup>103,</sup>  
31 <sup>104</sup>, Antti Jula<sup>103</sup>, Katri Sääksjärvi<sup>103</sup>, Veikko Salomaa<sup>103</sup>, Xiuqing Guo<sup>105</sup>, Susan R. Heckbert<sup>106</sup>,  
32 Henry J. Lin<sup>105</sup>, Jerome I. Rotter<sup>107</sup>, Kent D. Taylor<sup>105</sup>, Jie Yao<sup>108</sup>, Renée de Mutsert<sup>109</sup>, Arie C.  
33 Maan<sup>96</sup>, Dennis O. Mook-Kanamori<sup>109, 110</sup>, Raymond Noordam<sup>99</sup>, Francesco Cucca<sup>111</sup>, Jun Ding<sup>112</sup>,  
34 Edward G. Lakatta<sup>113</sup>, Yong Qian<sup>112</sup>, Kirill V. Tarasov<sup>113</sup>, Daniel Levy<sup>114, 115</sup>, Honghuang Lin<sup>115,</sup>  
35 <sup>116</sup>, Christopher H. Newton-Cheh<sup>3, 117</sup>, Kathryn L. Lunetta<sup>115, 118</sup>, Alison D. Murray<sup>119</sup>, David J.  
36 Porteous<sup>120, 121</sup>, Blair H. Smith<sup>122</sup>, Bruno H. Stricker<sup>123</sup>, André Uitterlinden<sup>124</sup>, Marten E. van den  
37 Berg<sup>123</sup>, Jeffrey Haessler<sup>125</sup>, Rebecca D. Jackson<sup>126</sup>, Charles Kooperberg<sup>125</sup>, Ulrike Peters<sup>125</sup>,  
38 Alexander P. Reiner<sup>125, 127</sup>, Eric A. Whitsel<sup>128</sup>, Alvaro Alonso<sup>129</sup>, Dan E. Arking<sup>130</sup>, Eric  
39 Boerwinkle<sup>131</sup>, Georg B. Ehret<sup>132</sup>, Elsayed Z. Soliman<sup>133</sup>, Christy L. Avery<sup>134, 135</sup>, Stephanie M.  
40 Gogarten<sup>91</sup>, Kathleen F. Kerr<sup>91</sup>, Cathy C. Laurie<sup>91</sup>, Amanda A. Seyerle<sup>136</sup>, Adrienne Stilp<sup>91</sup>,  
41 Solmaz Assa<sup>5</sup>, M. Abdullah Said<sup>5</sup>, M. Yldau van der Ende<sup>5</sup>, Pier D. Lambiase<sup>137, 138</sup>, Michele  
42 Orini<sup>137, 139</sup>, Julia Ramirez<sup>1, 138</sup>, Stefan Van Duijvenboden<sup>1, 138</sup>, David O. Arnar<sup>4, 60, 140</sup>, Daniel F.  
43 Gudbjartsson<sup>4, 141</sup>, Hilma Holm<sup>4</sup>, Patrick Sulem<sup>4</sup>, Gudmar Thorleifsson<sup>4</sup>, Rosa B. Thorolfsson<sup>4,</sup>  
44 <sup>60</sup>, Unnur Thorsteinsdottir<sup>4, 60</sup>, Emelia J. Benjamin<sup>115, 142, 143</sup>, Andrew Tinker<sup>1, 6</sup>, Kari Stefansson<sup>4,</sup>  
45 <sup>60</sup>, Patrick T. Ellinor<sup>2, 3, 144</sup>, Yalda Jamshidi<sup>145</sup>, Steven A. Lubitz<sup>2, 3, 144#</sup>, and Patricia B. Munroe<sup>1,</sup>  
46 <sup>6#</sup>

- 47
- 48 1. William Harvey Research Institute, Barts and The London School of Medicine and Dentistry,
- 49 Queen Mary University of London, London, UK.
- 50 2. Cardiovascular Research Center, Massachusetts General Hospital, Boston, MA, USA.
- 51 3. Program in Medical and Population Genetics, The Broad Institute of MIT and Harvard,
- 52 Cambridge, MA, USA.
- 53 4. deCODE genetics/Amgen, Inc., Reykjavik, Iceland.
- 54 5. University of Groningen, University Medical Center Groningen, Department of Cardiology,
- 55 Groningen, the Netherlands.
- 56 6. National Institute for Health Research, Barts Cardiovascular Biomedical Research Centre,
- 57 Queen Mary University of London, London, UK.
- 58 7. College of Health and Life Sciences, Hamad Bin Khalifa University, Education City, Doha,
- 59 Qatar.
- 60 8. Medical Research Council Human Genetics Unit, Institute of Genetics and Molecular
- 61 Medicine, University of Edinburgh, Edinburgh, UK.
- 62 9. Institute for Maternal and Child Health-IRCCS 'Burlo Garofolo', Trieste, Italy.
- 63 10. University of Trieste, Department of Medicine, Surgery and Health Sciences, Trieste, Italy.
- 64 11. University of Split School of Medicine, Split, Croatia.
- 65 12. Clinical Hospital Centre Split, Split, Croatia.
- 66 13. Psychiatric Hospital Sveti Ivan, Zagreb, Croatia.
- 67 14. Centre for Global Health Research, Usher Institute of Population Health Sciences and
- 68 Informatics, University of Edinburgh, Edinburgh, UK.

- 69 15. Departamento de Biologia Geral, Universidade Federal de Minas Gerais, Belo Horizonte,  
70 Minas Gerais, Brazil.
- 71 16. Rene Rachou Reserch Institute, Oswaldo Cruz Foundation, Belo Horizonte, Minas Gerais,  
72 Brazil.
- 73 17. Hospital das Clínicas e Faculdade de Medicina, Universidade Federal de Minas Gerais, Belo  
74 Horizonte, Minas Gerais, Brazil.
- 75 18. Department of Public Health, Geriatrics, Uppsala University, Uppsala, Sweden.
- 76 19. Department of Medicine, Division of Cardiovascular Medicine, Stanford University School of  
77 Medicine, Stanford, CA, USA.
- 78 20. Stanford Cardiovascular Institute, Stanford University, Stanford, CA, USA.
- 79 21. Stanford Diabetes Research Center, Stanford University, Stanford, CA, USA.
- 80 22. Department of Medical Sciences, Molecular Epidemiology and Science for Life Laboratory,  
81 Uppsala University, Uppsala, Sweden.
- 82 23. Wellcome Centre for Human Genetics, University of Oxford, Oxford, UK.
- 83 24. Department of Biostatistics, University of Liverpool, Liverpool, UK.
- 84 25. Division of Musculoskeletal and Dermatological Sciences, University of Manchester,  
85 Manchester, UK.
- 86 26. Institute for Biomedicine, Eurac Research, Affiliated Institute of the University of Lübeck,  
87 Bolzano, Italy.
- 88 27. Medical Sciences, Uppsala University Hospital, Uppsala, Sweden.
- 89 28. Li Ka Shing Centre for Health Information and Discovery, Big Data Institute, Nuffield  
90 Department of Medicine, University of Oxford , Oxford, UK.

- 91 29. The Wellcome Centre for Human Genetics, Nuffield Department of Medicine, University of  
92 Oxford , Oxford, UK.
- 93 30. The Broad Institute of MIT and Harvard, Cambridge, MA, USA.
- 94 31. Department of Medical Sciences, Uppsala University, Uppsala, Sweden.
- 95 32. Department of Cardiovascular Sciences, University of Leicester, Cardiovascular Research  
96 Centre, Glenfield Hospital, Leicester, UK.
- 97 33. NIHR Leicester Biomedical Research Centre, Glenfield Hospital, Groby Road, Leicester, UK.
- 98 34. Cardiovascular Department, Azienda Ospedaliera Universitaria Integrata of Trieste, Trieste,  
99 Italy.
- 100 35. Department of Clinical Physiology, Tampere University Hospital, Tampere, Finland.
- 101 36. Department of Clinical Physiology, Finnish Cardiovascular Research Center - Tampere,  
102 Faculty of Medicine and Health Technology, Tampere University, Tampere, Finland.
- 103 37. Department of Clinical Chemistry, Fimlab Laboratories, Tampere, Finland.
- 104 38. Department of Clinical Chemistry, Finnish Cardiovascular Research Center - Tampere,  
105 Faculty of Medicine and Health Technology, Tampere University, Tampere, Finland.
- 106 39. Department of Cardiology, Heart Center, Tampere University Hospital, Tampere, Finland.
- 107 40. Department of Cardiology, Finnish Cardiovascular Research Center - Tampere, Faculty of  
108 Medicine and Health Technology, Tampere University, Tampere, Finland.
- 109 41. Institute of Cardiovascular and Medical Sciences, College of Medical, Veterinary and Life  
110 Sciences, University of Glasgow, Glasgow, UK.
- 111 42. Institute of Cardiovascular and Medical Sciences, University of Glasgow, Glasgow, UK.
- 112 43. Division of Endocrinology, Diabetes, and Nutrition, University of Maryland School of  
113 Medicine, Baltimore, MD, USA.

- 114 44. Program for Personalized and Genomic Medicine, University of Maryland School of Medicine,  
115 Baltimore, MD, USA.
- 116 45. Cardiology Division, University Hospital, Basel, Switzerland.
- 117 46. Population Health Research Institute, McMaster University, Hamilton, Canada.
- 118 47. Institute of Clinical Chemistry, Inselspital Bern, University Hospital, University of Bern, Bern,  
119 Switzerland.
- 120 48. Labormedizinisches Zentrum Dr. Risch , Vaduz, Liechtenstein.
- 121 49. Private University of the Principality of Liechtenstein, Triesen, Liechtenstein.
- 122 50. Department of Molecular Biology, Medical Biochemistry and Pathology, Laval University,  
123 Quebec City, Canada.
- 124 51. Department of Pediatrics, Tampere University Hospital, Tampere, Finland.
- 125 52. Department of Pediatrics, Faculty of Medicine and Health Technology, Tampere University,  
126 Tampere, Finland.
- 127 53. Department of Clinical Physiology and Nuclear Medicine, Turku University Hospital, Turku,  
128 Finland.
- 129 54. Research Centre of Applied and Preventive Cardiovascular Medicine, University of Turku,  
130 Turku, Finland.
- 131 55. Centre for Population Health Research, University of Turku and Turku University  
132 Hospital, Turku, Finland.
- 133 56. CARIM School for Cardiovascular Diseases, Maastricht Center for Systems Biology  
134 (MaCSBio), Department. of Biochemistry, and Dept. of Physiology, Maastricht University,  
135 Maastricht, Netherlands.

- 136 57. Department of Medical Informatics Erasmus MC - University Medical Center Rotterdam,  
137 Rotterdam, the Netherlands.
- 138 58. Genetic Epidemiology Unit, Dept. of Epidemiology, Erasmus University Medical Center,  
139 Rotterdam, Netherlands.
- 140 59. Icelandic Heart Association, Kopavogur, Iceland.
- 141 60. Faculty of Medicine, University of Iceland, Reykjavik, Iceland.
- 142 61. Laboratory of Epidemiology and Population Sciences, National Institute on Aging, NIH,  
143 Baltimore, MD, USA.
- 144 62. School of Public Health, Department of Biostatistics, University of Michigan, Ann Arbor, MI,  
145 USA.
- 146 63. The Charles Bronfman Institute for Personalized Medicine, Icahn School of Medicine at Mount  
147 Sinai, New York, NY, USA.
- 148 64. The Mindich Child Health and Development Institute, Icahn School of Medicine at Mount  
149 Sinai, New York, NY 10029, New York, NY, USA.
- 150 65. Jackson Heart Study, Department of Medicine, University of Mississippi Medical Center,  
151 Jackson, MS, USA.
- 152 66. Department of Data Science, University of Mississippi Medical Center, Jackson, MS, USA.
- 153 67. Department of Physiology and Biophysics, University of Mississippi Medical Center, Jackson,  
154 MS, USA.
- 155 68. DZHK (German Centre for Cardiovascular Research), partner site Munich Heart Alliance,  
156 Munich, Germany.
- 157 69. Institute of Human Genetics, Helmholtz Zentrum München - German Research Center for  
158 Environmental Health, Neuherberg, Germany.

- 159 70. Institute of Human Genetics, Klinikum rechts der Isar, Technische Universität München,  
160 Munich, Germany.
- 161 71. Institute of Genetic Epidemiology, Helmholtz Zentrum München - German Research Center  
162 for Environmental Health, Neuherberg, Germany.
- 163 72. Chair of Genetic Epidemiology, IBE, Faculty of Medicine, LMU Munich, Munich, Germany.
- 164 73. Department of Internal Medicine I (Cardiology), Hospital of the Ludwig-Maximilians-  
165 University (LMU) Munich, Munich, Germany.
- 166 74. German Center for Diabetes Research, Neuherberg, Germany.
- 167 75. Institute of Epidemiology, Helmholtz Zentrum München - German Research Center for  
168 Environmental Health, Neuherberg, Germany.
- 169 76. Research Unit of Molecular Epidemiology, Helmholtz Zentrum München - German Research  
170 Center for Environmental Health, Neuherberg, Germany.
- 171 77. Department of Twin Research and Genetic Epidemiology, Kings College London, London,  
172 UK.
- 173 78. NIHR Biomedical Research Centre at Guy's and St Thomas' Foundation Trust, London, UK.
- 174 79. Genomics plc, Oxford, UK.
- 175 80. Intermountain Heart Institute, Intermountain Medical Center, Murray, UT, USA.
- 176 81. Molecular Cardiology and Biophysics Division, Victor Chang Cardiac Research Institute,  
177 Darlinghurst, Australia.
- 178 82. Cardiology Department, St. Vincent's Hospital, Darlinghurst, Australia.
- 179 83. St Vincent's Clinical School, Faculty of Medicine, UNSW Sydney, Kensington, Australia.
- 180 84. Department of Cardiovascular Medicine, University of Iowa, Iowa City, Iowa, USA.



- 181 85. Laboratory for Molecular Cardiology, Department of Cardiology, The Heart Centre,  
182 Rigshospitalet, University Hospital of Copenhagen, Copenhagen, Denmark.
- 183 86. Department of Biomedical Sciences, University of Copenhagen, Copenhagen, Denmark.
- 184 87. Departments of Medicine, Pharmacology, and Biomedical Informatics, Vanderbilt University  
185 Medical Center, Nashville, TN, USA.
- 186 88. Department of Medicine, Vanderbilt University Medical Center, Nashville, TN, USA.
- 187 89. Department of Cardiology, Clinical Sciences; Wallenberg Center for Molecular Medicine;  
188 Lund University Diabetes Center; Lund University and Skane University Hospital, Lund, Sweden,  
189 Lund, Sweden.
- 190 90. Cardiovascular Health Research Unit, Department of Medicine, University of Washington,  
191 Seattle, WA, USA.
- 192 91. Department of Biostatistics, University of Washington, Seattle, WA, USA.
- 193 92. Department of Epidemiology, University of Washington, Seattle, WA, USA.
- 194 93. Kaiser Permanente Washington Health Research Institute, Seattle, WA, USA.
- 195 94. Cardiology Division, University of Washington, Seattle, WA, USA.
- 196 95. Robertson Center for Biostatistics, University of Glasgow, Glasgow, UK.
- 197 96. Department of Cardiology, Leiden University Medical Center, Leiden, the Netherlands.
- 198 97. Einthoven Laboratory for Experimental Vascular Medicine, Leiden University Medical  
199 Center, Leiden, the Netherlands.
- 200 98. Institute of Health and Wellbeing, College of Medical, Veterinary and Life Sciences,  
201 University of Glasgow, Glasgow, UK.
- 202 99. Department of Internal Medicine, section of Gerontology and Geriatrics, Leiden University  
203 Medical Center, Leiden, The Netherlands.

- 204 100. DZHK (German Centre for Cardiovascular Research); partner site Greifswald, Greifswald,  
205 Germany.
- 206 101. Department of Internal Medicine B - Cardiology, Pneumology, Infectious Diseases,  
207 Intensive Care Medicine; University Medicine Greifswald, Greifswald, Germany.
- 208 102. Interfaculty Institute for Genetics and Functional Genomics; Department of Functional  
209 Genomics; University Medicine and University of Greifswald, Greifswald, Germany.
- 210 103. National Institute for Health and Welfare, Helsinki, Finland.
- 211 104. Institute for Molecular Medicine Finland (FIMM), HiLIFE, University of Helsinki,  
212 Helsinki, Finland.
- 213 105. Institute for Translational Genomics and Population Sciences and Department of  
214 Pediatrics, Los Angeles Biomedical Research Institute at Harbor-UCLA Medical Center,  
215 Torrance, CA, USA.
- 216 106. Cardiovascular Health Research Unit and Department of Epidemiology, University of  
217 Washington, Seattle, WA, USA.
- 218 107. Institute for Translational Genomics and Population Sciences and Departments of  
219 Pediatrics and Medicine, Los Angeles Biomedical Research Institute at Harbor-UCLA Medical  
220 Center, Torrance, CA, USA.
- 221 108. Institute for Translational Genomics and Population Sciences, Los Angeles Biomedical  
222 Research Institute at Harbor-UCLA Medical Center, Torrance, CA, USA.
- 223 109. Department of Clinical Epidemiology, Leiden University Medical Center, Leiden, the  
224 Netherlands.
- 225 110. Department of Public Health and Primary Care, Leiden University Medical Center, Leiden,  
226 the Netherlands.

- 227 111. Department of Biomedical Sciences, University of Sassari, Sassari, Italy.
- 228 112. Laboratory of Genetics and Genomics, NIA/NIH , Baltimore, MD, USA.
- 229 113. Laboratory Of Cardiovascular Science, NIA/NIH, Baltimore, MD, USA.
- 230 114. Population Sciences Branch, Division of Intramural Research, National Heart, Lung, and  
231 Blood Institute, Bethesda, MD, USA.
- 232 115. National Heart Lung and Blood Institute's and Boston University's Framingham Heart  
233 Study, Framingham, MA, USA.
- 234 116. Section of Computational Biomedicine, Department of Medicine, Boston University  
235 School of Medicine, Boston, MA, USA.
- 236 117. Center for Human Genetic Research and Cardiovascular Research Center, Harvard  
237 Medical School and Massachusetts General Hospital, Boston, MA, USA.
- 238 118. Department of Biostatistics, Boston University School of Public Health, Boston, MA,  
239 USA.
- 240 119. The Institute of Medical Sciences, Aberdeen Biomedical Imaging Centre, University of  
241 Aberdeen, Aberdeen, UK.
- 242 120. Centre for Genomic and Experimental Medicine, Institute of Genetics & Molecular  
243 Medicine, University of Edinburgh, Western General Hospital, Edinburgh, UK.
- 244 121. Centre for Cognitive Ageing and Cognitive Epidemiology, University of Edinburgh,  
245 Edinburgh, UK.
- 246 122. Division of Population Health and Genomics, Ninewells Hospital and Medical School,  
247 University of Dundee, Dundee, UK.
- 248 123. Department of Epidemiology Erasmus MC - University Medical Center Rotterdam,  
249 Rotterdam, the Netherlands.

- 250 124. Human Genotyping Facility Erasmus MC University Medical Center Rotterdam,  
251 Rotterdam, the Netherlands.
- 252 125. Fred Hutchinson Cancer Research Center, Division of Public Health Sciences, Seattle, WA,  
253 USA.
- 254 126. Ohio State University, Division of Endocrinology, Diabetes and Metabolism, Columbus,  
255 OH, USA.
- 256 127. University of Washington, Department of Epidemiology, Seattle, WA, USA.
- 257 128. University of North Carolina, Gillings School of Global Public Health and School of  
258 Medicine, Departments of Epidemiology and Medicine, Chapel Hill, NC, USA.
- 259 129. Department of Epidemiology, Rollins School of Public Health, Emory University, Atlanta,  
260 GA, USA.
- 261 130. McKusick-Nathans Institute of Genetic Medicine, Johns Hopkins University School of  
262 Medicine, Baltimore, MD, USA.
- 263 131. Human Genetics Center, University of Texas Health Science Center at Houston, Houston,  
264 TX, USA.
- 265 132. Cardiology, Geneva University Hospitals, Geneva, Switzerland.
- 266 133. Epidemiological Cardiology Research Center, Wake Forest School of Medicine, Winston-  
267 Salem, NC, USA.
- 268 134. Department of Epidemiology, University of North Carolina, Chapel Hill, NC, USA.
- 269 135. Carolina Population Center, University of North Carolina, Chapel Hill, NC, USA.
- 270 136. Division of Pharmaceutical Outcomes and Policy, University of North Carolina, Chapel  
271 Hill, NC, USA.
- 272 137. Barts Heart Centre, St Bartholomews Hospital, London, United Kingdom, London, UK.

- 273 138. Institute of Cardiovascular Science, University College London, London, UK.
- 274 139. Department of Mechanical Engineering, University College London, London, UK.
- 275 140. Department of Medicine, Landspítali University Hospital, Reykjavik, Iceland.
- 276 141. School of Engineering and Natural Sciences, University of Iceland, Reykjavik, Iceland.
- 277 142. Section of Cardiovascular Medicine and Section of Preventive Medicine, Department of
- 278 Medicine, Boston University School of Medicine, Boston, MA, USA.
- 279 143. Department of Epidemiology, Boston University School of Public Health, Boston, MA,
- 280 USA.
- 281 144. Cardiac Arrhythmia Service, Massachusetts General Hospital, Boston, MA, USA.
- 282 145. Genetics Research Centre, Molecular and Clinical Sciences Institute, St George's,
- 283 University of London, London, UK.

284

285

286 \* These authors contributed equally. # These authors jointly directed this work.

287

288 Correspondence to: slubitz@mgh.harvard.edu and p.b.munroe@qmul.ac.uk

289

# **Abstract**

The electrocardiographic PR interval reflects atrioventricular conduction, and is associated with conduction abnormalities, pacemaker implantation, atrial fibrillation (AF), and cardiovascular mortality<sup>1,2</sup>. We performed multi-ancestry (N=293,051) and European only (N=271,570) genome-wide association (GWAS) meta-analyses for the PR interval, discovering 210 loci of which 149 are novel. Variants at all loci nearly doubled the percentage of heritability explained, from 33.5% to 62.6%. We observed enrichment for genes involved in cardiac muscle development/contraction and the cytoskeleton highlighting key regulation processes for atrioventricular conduction. Additionally, 19 novel loci harbour genes underlying inherited monogenic heart diseases suggesting the role of these genes in cardiovascular pathology in the general population. We showed that polygenic predisposition to PR interval duration is an endophenotype for cardiovascular disease risk, including distal conduction disease, AF, atrioventricular pre-excitation, non-ischemic cardiomyopathy, and coronary heart disease. These findings advance our understanding of the polygenic basis of cardiac conduction, and the genetic relationship between PR interval duration and cardiovascular disease.

## Main text

The electrocardiogram is among the most common clinical tests ordered to assess cardiac abnormalities. Reproducible waveforms indicating discrete electrophysiologic processes were described over 100 years ago, yet the biological underpinnings of conduction and repolarization remain incompletely defined. The electrocardiographic PR interval reflects conduction from the atria to ventricles, across specialised conduction tissues such as the atrioventricular node and the His-Purkinje system. Pathological variation in the PR interval may indicate heart block or pre-excitation, both of which can lead to sudden death<sup>2</sup>. The PR interval also serves as a risk factor for AF and cardiovascular mortality<sup>1-3</sup>. Prior genetic association studies have identified 64 PR interval loci<sup>4-13</sup>. To enhance our understanding of the genetic and biological mechanisms of atrioventricular conduction, we performed GWAS meta-analyses of autosomal and X chromosome variants imputed mainly with the 1000 Genomes Project reference panel<sup>14</sup> using an additive model and increased sample size. Our primary meta-analysis included 293,051 individuals of European (92.6%), African (2.7%), Hispanic (4%), and Brazilian (<1%) ancestries from 40 studies (**Supplementary Tables 1-3**). We also performed ancestry-specific meta-analyses (**Fig. 1**).

We identified a total of 210 genome-wide significant loci ( $P < 5 \times 10^{-8}$ ), of which 149 were not previously reported (**Table 1, Fig. 2**). Of the 149 novel loci, 141 were discovered in the multi-ancestry analysis, and 8 additional novel loci were identified in the European ancestry analysis (**Table 1, Fig. 2, Supplementary Tables 4-5, Supplementary Fig. 1-4**). We considered only variants present in >60% of the maximum sample size, a filtering criterion used to ensure robustness of associated loci (**Online Methods**). There was strong support for all 64 previously reported loci (61 at  $P < 5 \times 10^{-8}$  and 3 at  $P < 1.1 \times 10^{-4}$ ; **Supplementary Tables 6-7**). No additional novel loci were identified in African or Hispanic/Latino ancestry meta-analyses (**Supplementary**

**Table 8, Supplementary Fig. 1 and 3)** or X chromosome meta-analyses (**Supplementary Fig. 5**). In secondary analyses, we examined the rank-based inverse normal transformed residuals of PR interval. Results of absolute and transformed trait meta-analyses were highly correlated ( $\rho > 0.94$ , **Supplementary Tables 5, 9-10, Supplementary Fig. 6-7**).

By applying joint and conditional analyses in the European meta-analysis data, we identified multiple independently associated variants ( $P_{\text{joint}} < 5 \times 10^{-8}$  and  $r^2 < 0.1$ ) at 12 novel and 25 previously reported loci (**Supplementary Table 11**). The overall variant-based heritability ( $h^2_g$ ) for the PR interval estimated in 59,097 unrelated European participants from the UK Biobank (UKB) with electrocardiograms was 18.2% (**Online Methods**). In the UKB, the proportion of  $h^2_g$  explained by variation at all loci discovered in our analysis was 62.6%, compared to 33.5% when considering previously reported loci only.

The majority of the lead variants at the 149 novel loci were common (minor allele frequency, MAF > 5%). We observed 6 low-frequency (MAF 1-5%) variants, and one rare (MAF < 1%) predicted damaging missense variant (rs35816944, p.Ser171Leu) in *SPSB3* encoding SplA/Ryanodine Receptor Domain and SOCS Box-containing 3. *SPSB3* is involved in degradation of SNAIL transcription factor, which regulates the epithelial-mesenchymal transition<sup>15</sup>, and has not been previously associated with cardiovascular traits. In total, we identified missense variants in genes at 12 novel and 6 previously reported loci (**Supplementary Table 12**). At *MYH6*, a previously described locus for PR interval<sup>6,10</sup>, sick sinus syndrome<sup>16</sup>, AF and other cardiovascular traits<sup>17</sup>, we observed a novel predicted damaging missense variant in *MYH6* (rs28711516, p.Gly56Arg). *MYH6* encodes the  $\alpha$ -heavy chain subunit of cardiac myosin.



PR interval lead variants (or best proxy [ $r^2 > 0.8$ ]) at 39 novel and 23 previously reported loci were significant cis-eQTLs (at a 5% false discovery rate (FDR) in left ventricle (LV) and right atrial appendage (RAA) tissue samples from the Genotype-Tissue Expression (GTEx) project<sup>18</sup> (**Supplementary Table 13**). Variants at 21 novel loci were significant eQTLs in both tissues with consistent directionality of gene expression. We also performed a transcriptome-wide analysis to evaluate associations between predicted gene expression in LV and RAA with the PR interval. We identified 120 genes meeting our significance threshold ( $P < 4.4 \times 10^{-6}$ , after Bonferroni correction); 26 genes were not localised at PR interval loci ( $\geq 500$ kb from a lead variant) representing potentially novel regions (**Supplementary Table 14, Supplementary Fig. 8**). Longer PR interval duration was associated with decreased levels of predicted gene expression for 61 genes, and increased levels for 59 genes (**Fig. 3**).

Most PR interval variants were annotated as non-coding. We therefore explored whether associated variants or proxies were located in transcriptionally active genomic regions. We observed enrichment for DNase I-hypersensitive sites in fetal heart tissue ( $P < 9.36 \times 10^{-5}$ , **Supplementary Fig. 9**). Analysis of chromatin states indicated variants at 103 novel and 52 previously reported loci were located within regulatory elements that are present in heart tissues (**Supplementary Table 15**), providing support for gene regulatory mechanisms in specifying the PR interval. To identify distal candidate genes at PR interval loci, we assessed the same set of variants for chromatin interactions in a LV tissue Hi-C dataset<sup>19</sup>. Forty-eight target genes were identified (**Supplementary Table 16**). Variants at 38 novel loci were associated with other traits, including AF and coronary heart disease (**Supplementary Table 17, Supplementary Fig. 10**).

Candidate genes indicated by bioinformatics and *in silico* functional annotations at each novel locus are summarised in **Supplementary Tables 18-19**, and include 19 genes known to underlie

monogenic cardiovascular diseases. Enrichment analysis of genes at PR interval loci using DEPICT<sup>20</sup> indicated heart development ( $P=1.87\times 10^{-15}$ ) and actin cytoskeleton organisation ( $P=2.20\times 10^{-15}$ ) as the most significantly enriched processes (**Supplementary Table 20**). Ingenuity Pathway Analysis (IPA) supported heart development, ion channel signaling and cell-junction/cell-signaling amongst the most significant canonical pathways (**Supplementary Table 21**).

Finally, we evaluated associations between genetic predisposition to PR interval duration and 16 cardiac phenotypes chosen *a priori* using ~309,000 unrelated UKB European participants not included in our meta-analyses<sup>21</sup>. We created a polygenic risk score (PRS) for PR interval using the multi-ancestry meta-analysis results (**Fig. 4, Supplementary Table 22**). Genetically determined PR interval prolongation was associated with higher risk of distal conduction disease (atrioventricular block; odds ratio [OR] per standard deviation 1.11,  $P=3.18\times 10^{-8}$ ) and pacemaker implantation (OR 1.06,  $P=0.0005$ ). In contrast, genetically determined PR interval prolongation was associated with reduced risk of AF (OR 0.94,  $P=1.30\times 10^{-11}$ ) and atrioventricular pre-excitation (Wolff-Parkinson-White syndrome; OR 0.83,  $P=8.36\times 10^{-4}$ ). Genetically determined PR interval prolongation was marginally associated with a reduced risk of non-ischemic cardiomyopathy (OR=0.95,  $P=0.046$ ) and coronary heart disease (OR 0.99,  $P=0.035$ ). Results were similar when using a PRS derived using the European ancestry meta-analysis results (**Supplementary Fig. 11, Supplementary Table 22**).

To summarise, in meta-analyses of nearly 300,000 individuals we identified 210 loci, of which 149 were novel, underlying cardiac conduction as manifested by the electrocardiographic PR interval. Apart from confirming well-established associations in loci harbouring ion-channel genes, our findings further underscore the central importance of heart development and

cytoskeletal components in atrioventricular conduction<sup>10,12,13</sup>. We also highlight the role of common variation at loci harboring genes underlying monogenic forms of heart disease in cardiac conduction.

We report signals in/near 13 candidate genes at novel loci with functional roles in cytoskeletal assembly (*DSP*, *DES*, *OBSL1*, *MYH11*, *PDLIM5*, *LDB3*, *FHL2*, *CEFIP*, *SSPN*, *TLN*, *PTK2*, *GJA5* and *CDH2*; **Fig. 5**). *DSP* and *DES* encode components of the cardiac desmosome, a complex involved in ionic communication between cardiomyocytes and maintenance of cellular integrity. Mutations in the desmosome are implicated in arrhythmogenic cardiomyopathy (ACM) and dilated cardiomyopathy (DCM)<sup>22-26</sup>. Conduction slowing is a major component of the pathophysiology of arrhythmia in ACM and other cardiomyopathies<sup>27,28</sup>. *OBSL1* encodes obscurin-like 1, which together with obscurin (OBSCN) is involved in sarcomerogenesis by bridging titin (TTN) and myomesin at the M-band<sup>29</sup>. *PDLIM5* encodes a scaffold protein that tethers protein kinases to the Z-disk, and has been associated with DCM in homozygous murine cardiac knockouts<sup>30</sup>. *FHL2* encodes calcineurin-binding protein four and a half LIM domains 2, which is involved in cardiac development by negatively regulating calcineurin/NFAT signaling in cardiomyocytes<sup>31</sup>. Missense mutations in *FHL2* have been associated with hypertrophic cardiomyopathy<sup>32</sup>. *CEFIP* encodes the cardiac-enriched FHL2-interacting protein located at the Z-disc, which interacts with *FHL2*. It is also involved in calcineurin–NFAT signaling, but its overexpression leads to cardiomyocyte hypertrophy<sup>33</sup>.

Common variants in/near genes associated with inherited arrhythmia syndromes were also observed, suggesting these genes also affect atrioventricular conduction and cardiovascular pathology in the general population. Apart from *DSP*, *DES*, *MYH11* and *GJA5* listed above, our analyses indicate 15 additional candidate genes (*ADRB1*, *ALPK3*, *BMPRI1*, *BMPRI2*, *CRYAB*,

*DERL3, DNAH11, DTNA, ETV1, HCN4, MYOZ2, PDE3A, RYR2, SPEG, LDB3*) at novel loci causing Mendelian or other inherited forms of cardiovascular disease. Two genes we highlight are *HCN4* and *RYR2*. *HCN4* encodes a component of the hyperpolarization-activated cyclic nucleotide-gated potassium channel which specifies the sinoatrial pacemaker “funny” current, and is implicated in sinus node dysfunction, AF, and left ventricular noncompaction<sup>34-36</sup>. *RYR2* encodes a calcium channel component in the cardiac sarcoplasmic reticulum and is implicated in catecholaminergic polymorphic ventricular tachycardia<sup>37</sup>.

Genes with roles in autonomic signaling in the heart (*CHRM2, ADCY5*) were indicated from expression analyses. *CHRM2* encodes the M2 muscarinic cholinergic receptors that bind acetylcholine and are expressed in the heart<sup>38</sup>. Their stimulation results in inhibition of adenylate cyclase encoded by *ADCY5*, which in turn inhibits ion channel function. Ultimately, the signaling cascade can result in reduced levels of the pacemaker “funny” current in the sinoatrial and atrioventricular nodes, reduced L-type calcium current in all myocyte populations, and increased inwardly rectifying  $I_{K,ACh}$  potassium current in the conduction tissues and atria causing cardiomyocyte hyperpolarization<sup>39</sup>. Stimulation has also been reported to shorten atrial action potential duration and thereby facilitate re-entry, which may lead to AF<sup>40-42</sup>.

By constructing PRSs, we also observed that genetically determined PR interval duration is an endophenotype for several adult-onset complex cardiovascular diseases, the most significant of which are arrhythmias and conduction disorders. For example, our findings are consistent with previous epidemiologic data supporting a U-shaped relationship between PR interval duration and AF risk<sup>1</sup>. Although aggregate genetic predisposition to PR interval prolongation is associated with reduced AF risk, top PR interval prolonging alleles are associated with decreased AF risk (e.g., localized to the *SCN5A/SCN10A* locus) whereas others are associated with increased AF risk (e.g.,

localized to the *TTN* locus), consistent with prior reports<sup>8</sup>. These findings suggest that genetic determinants of the PR interval may identify distinct pathophysiologic mechanisms leading to AF, perhaps via specifying differences in tissue excitability, conduction velocity, or refractoriness. Future efforts are warranted to better understand the relations between genetically determined PR interval and specific arrhythmia mechanisms.

In conclusion, our study more than triples the reported number of PR interval loci, which collectively explain ~62% of trait-related heritability. Our findings highlight important biological processes underlying atrioventricular conduction which include both ion channel function, and specification of cytoskeletal components. Our study also indicates that common variation in Mendelian cardiovascular disease genes contributes to population-based variation in the PR interval. Lastly, we observed that genetic determinants of the PR interval provide novel insights into the etiology of several complex cardiac diseases, including AF. Collectively, our results represent a major advance in understanding the polygenic nature of cardiac conduction, and the genetic relationship between PR interval duration and arrhythmias.

## Online Methods

### Contributing studies

A total of 40 studies (**Supplementary Note**) comprising 293,051 individuals of European (N=271,570), African (N=8,173), Hispanic (N=11,686), and Brazilian (N=485) ancestries contributed GWAS summary statistics for PR interval. All participating institutions and coordinating centres approved this project, and informed consent was obtained from all study participants. Study-specific design, sample quality control and descriptive statistics are provided in **Supplementary Tables 1-3**. For the majority of the studies imputation was performed for autosomal chromosomes and X chromosome using the 1000 Genomes (1000G) project<sup>14</sup> reference panel or a most recently released haplotype version (**Supplementary Table 2**).

### PR interval phenotype and exclusions

The PR interval was measured in milliseconds from standard 12-lead electrocardiograms (ECGs), except in the UK-Biobank in which it was obtained from 4-lead ECGs (CAM-USB 6.5, Cardiosoft v6.51) recorded during a 15 second rest period prior to an exercise test (**Supplementary Note**). We excluded individuals with extreme PR interval values (<80ms or >320ms), second/third degree heart block, AF on the ECG, or a history of myocardial infarction or heart failure, Wolff-Parkinson-White syndrome, pacemakers, receiving class I and class III antiarrhythmic medications, digoxin, and pregnancy.

## *Study-level association analyses*

We regressed the absolute PR interval on each genotype dosage using multiple linear regression with an additive genetic effect and adjusted for age, sex, height, body mass index, heart rate and any other study specific covariates. To account for relatedness, linear mixed effects models were used for family studies. To account for population structure, analyses were also adjusted for principal components of ancestry derived from genotyped variants after excluding related individuals. Analyses of autosomal variants were conducted separately for each ancestry group. X chromosome analyses were performed separately for males and females. Analyses using rank-based inverse normal transformed residuals of PR interval corrected for the aforementioned covariates were also conducted. Residuals were calculated separately by ancestral group for autosomal variants, and separately for males and females for X chromosome variants.

## *Centralized quality control*

We performed quality control centrally for each result file using EasyQC version 11.4<sup>43</sup>. We removed variants that were monomorphic, had a minor allele count (MAC) <6, imputation quality metric <0.3 (imputed by MACH) or 0.4 (imputed by IMPUTE2), had invalid or mismatched alleles, were duplicated, or if they were allele frequency outliers (difference >0.2 from the allele frequency in 1000G project). We inspected PZ plots, effect allele frequency plots, effect size distributions, QQ plots, and compared effect sizes in each study to effect sizes from prior reports for established PR interval loci to identify genotype and study level anomalies. Variants with effective MAC ( $=2 \times N \times \text{MAF} \times \text{imputation quality metric}$ ) <10 were omitted from each study prior to meta-analysis.

499

## 500 *Meta-analyses*

501 We aggregated summary level associations between genotypes and absolute PR interval from all  
 502 individuals (N=293,051), and only from Europeans (N=271,570), African Americans (N=8,173),  
 503 and Hispanic/Latinos (N=12,823) using a fixed-effects meta-analysis approach implemented in  
 504 METAL (release on 2011/03/25)<sup>44</sup>. For the X chromosome, meta-analyses were conducted in a  
 505 sex-stratified fashion. Genomic control was applied (if inflation factor  $\lambda_{GC}>1$ ) at the study level.  
 506 Quantile–quantile (QQ) plots of observed versus expected  $-\log_{10}(P)$  did not show substantive  
 507 inflation (**Supplementary Figs. 1-2**).

508 Given the large sample size we undertook a one-stage discovery study design. To ensure the  
 509 robustness of this approach we considered for further investigation only variants reaching genome-  
 510 wide significance ( $P<5\times 10^{-8}$ ) present in at least 60% of the maximum sample size ( $N_{max}$ ). We  
 511 declared as novel any variants mapping outside the 64 loci previously reported (**Supplementary**  
 512 **Note, Supplementary Table 6**). We grouped genome-wide significant variants into independent  
 513 loci based on both distance ( $\pm 500\text{kb}$ ) and linkage disequilibrium (LD,  $r^2<0.1$ ) (**Supplementary**  
 514 **Note**). We assessed heterogeneity in allelic effect sizes among studies contributing to the meta-  
 515 analysis and among ancestral groups by the  $I^2$  inconsistency index<sup>45</sup> for the lead variant in each  
 516 novel locus. LocusZoom<sup>46</sup> was used to create region plots of identified loci.

517 Meta-analyses (multi-ancestry [N=282,128], European only [N=271,570], and African  
 518 [N=8,173]) of rank-based inverse normal transformed residuals of PR interval were also  
 519 performed. Because not all studies contributed summary level association statistics of the  
 520 transformed PR interval, we considered as primary the meta-analysis of absolute PR interval for



which we achieved the maximum sample size. Any loci that met our significance criteria in the meta-analyses of transformed PR interval were not taken forward for downstream analyses.

### *Conditional and heritability analysis*

Conditional and joint GWAS analyses were implemented in GCTA v1.91.3<sup>47</sup> using summary level variant statistics from the European ancestry meta-analysis to identify independent association signals within PR interval loci. We used 59,097 unrelated (kinship coefficient >0.0884) UK Biobank participants of European ancestry as the reference sample to model patterns of LD between variants. We declared as conditionally independent any genome-wide significant variants in conditional analysis ( $P_{\text{joint}} < 5 \times 10^{-8}$ ) not in LD ( $r^2 < 0.1$ ) with the lead variant in the locus.

Using the same set of individuals from UK Biobank, we estimated the aggregate genetic contributions to PR interval with restricted maximum likelihood as implemented in BOLT-REML<sup>48</sup>. We calculated the additive overall variant-heritability ( $h^2_g$ ) based on 333,167 LD-pruned genotyped variants, as well as the  $h^2_g$  of variants at PR interval associated loci only. Loci windows were based on both distance ( $\pm 500\text{kb}$ ) and LD ( $r^2 > 0.1$ ) around novel and previously reported variants (**Supplementary Note**). We then calculated the proportion of total  $h^2_g$  explained at PR interval loci by dividing the  $h^2_g$  estimate of PR interval loci by the total  $h^2_g$ .

# *Bioinformatics and in silico functional analyses*

We use Variant Effect Predictor (VEP)<sup>49</sup> to obtain functional characterization of variants including consequence, information on nearest genes and, where applicable, amino acid substitution and functional impact, based on SIFT<sup>50</sup> and PolyPhen-2<sup>51</sup> prediction tools. For non-coding variants, we assessed overlap with DNase I-hypersensitive sites (DHS) and chromatin states as determined by Roadmap Epigenomics Project<sup>52</sup> across all tissues and in cardiac tissues (E083, fetal heart; E095, LV; E104, right atrium; E105, right ventricle) using HaploReg v4<sup>53</sup>.

We assessed whether any PR interval variants were related to cardiac gene expression using GTEx<sup>18</sup> version 7 cis-eQTL LV (N=272) and RAA (N=264) data. If the variant at a locus was not available in GTEx, we used proxy variants ( $r^2 > 0.8$ ). We report results only for associations at a false discovery rate (FDR) of 5%. We then evaluated the effects of predicted gene expression levels on PR interval duration using S-PrediXcan<sup>54</sup>. GTEx<sup>18</sup> genotypes (variants with MAF > 0.01) and normalized expression data in LV and RAA provided by the software developers were used as the training datasets for the prediction models. The prediction models between each gene-tissue pair were performed by Elastic-Net, and only significant (FDR 5%) models for prediction were included in our analysis. We used the European meta-analysis summary-level results (variants with at least 60% of maximum sample size) as the study dataset and then performed the S-PrediXcan calculator to estimate the expression-PR interval associations. In total, we tested 5,366 and 5,977 associations in LV and RAA, respectively. Significance threshold was set at  $P = 4.4 \times 10^{-6}$  ( $= 0.05 / (5,977 + 5,366)$ ) to account for multiple testing corrections.

We applied GARFIELD (GWAS analysis of regulatory or functional information enrichment with LD correction)<sup>55</sup> to analyse the enrichment patterns for functional annotations of the European

meta-analysis summary statistics, using regulatory maps from the Encyclopedia of DNA Elements (ENCODE)<sup>56</sup> and Roadmap Epigenomics<sup>52</sup> projects. This method calculates odds ratios and enrichment P-values at different GWAS P-value thresholds (denoted T) for each annotation by using a logistic regression model accounting for LD, matched genotyping variants and local gene density with the application of logistic regression to derive statistical significance. Threshold for significant enrichment was set to  $P=9.36 \times 10^{-5}$  (after multiple-testing correction for the number of effective annotations).

We identified potential target genes of regulatory variants using long-range chromatin interaction (Hi-C) data from the LV<sup>19</sup>. Hi-C data was corrected for genomic biases and distance using the Hi-C Pro and Fit-Hi-C pipelines according to Schmitt *et al.* (40kb resolution – correction applied to interactions with 50kb-5Mb span). We identified the promoter interactions for all potential regulatory variants in LD ( $r^2 > 0.8$ ) with our lead and conditionally independent PR interval variants and report the interactors with the variants with the highest regulatory potential (RegulomeDB $\geq 2$ ) to annotate the loci.

We performed a literature review, and queried the Online Mendelian Inheritance in Man (OMIM) and the International Mouse Phenotyping Consortium databases for all genes in regions defined by  $r^2 > 0.5$  from the lead variant at each novel locus. We further expanded the gene listing with any genes that were indicated by gene expression or chromatin interaction analyses. We performed look-ups for each lead variant or their proxies ( $r^2 > 0.8$ ) for associations ( $P < 5 \times 10^{-8}$ ) for common traits using both GWAS catalog<sup>57</sup> and PhenoScanner v2<sup>58</sup> databases. For AF, we supplemented the variant listing with a manually curated list of all overlapping variants ( $r^2 > 0.7$ ) with PR interval from two recently published GWASs<sup>59,60</sup>.

583

# 584 *Gene set enrichment and pathway analyses*

585 We used DEPICT (Data-driven Expression-Prioritized Integration for Complex Traits)<sup>20</sup> to  
 586 identify enriched pathways and tissues/cell types where genes from associated loci are highly  
 587 expressed using all genome-wide significant ( $P < 5 \times 10^{-8}$ ) variants in our multi-ancestry meta-  
 588 analysis present in at least 60% of  $N_{\max}$  ( $N=20,076$ ). To identify uncorrelated variants for PR  
 589 interval, DEPICT performed LD-clumping ( $r^2=0.1$ , window size=250kb) using LD estimates  
 590 between variants from the 1000G reference data on individuals from all ancestries after excluding  
 591 the major histocompatibility complex region on chromosome 6. Gene-set enrichment analysis was  
 592 conducted based on 14,461 predefined reconstituted gene sets from various databases and data  
 593 types, including Gene ontology, Kyoto encyclopedia of genes and genomes (KEGG),  
 594 REACTOME, phenotypic gene sets derived from the Mouse genetics initiative, and protein  
 595 molecular pathways derived from protein-protein interaction. Finally, tissue and cell type  
 596 enrichment analysis was performed based on expression information in any of the 209 Medical  
 597 Subject Heading (MeSH) annotations for the 37,427 human Affymetrix HGU133a2.0 platform  
 598 microarray probes.

599 Ingenuity Pathway Analysis (IPA) was conducted using an extended list comprising 593 genes  
 600 located in regions defined by  $r^2 > 0.5$  with the lead or conditionally independent variants for all PR  
 601 interval loci, or the nearest gene. We further expanded this list by adding genes indicated by gene  
 602 expression analyses. Only molecules and/or relationships for human or mouse or rat and  
 603 experimentally verified results were considered. The significance P-value associated with  
 604 enrichment of functional processes is calculated using the right-tailed Fisher's exact test by

considering the number of query molecules that participate in that function and the total number of molecules that are known to be associated with that function in the IPA.

### ***Associations between genetically determined PR interval and cardiovascular conditions***

We examined associations between genetic determinants of atrioventricular conduction and candidate cardiovascular diseases in unrelated individuals of European ancestry from UK Biobank (N~309,000 not included in our GWAS meta-analyses) by creating PRSs for PR interval based on our GWAS results. We derived two PRSs. One was derived from the multi-ancestry meta-analysis results, and the other from the European meta-analysis results. We used the LD-clumping feature in PLINK v1.90<sup>61</sup> ( $r^2=0.1$ , window size=250kb,  $P=5\times 10^{-8}$ ) to select variants for each PRS. Referent LD structure was based on 1000G all ancestry, and European only data. In total, we selected 743 and 582 variants from multi-ancestry and European only meta-analysis results, respectively. We calculated the PRSs for PR interval by summing the dosage of PR interval prolonging alleles weighted by the corresponding effect size from the meta-analysis results. A total of 743 variants for the PRS derived from multi-ancestry results and 581 variants for the PRS derived from European results (among the variants with imputation quality >0.6) were included in our PRS calculations.

We selected candidate cardiovascular conditions *a priori*, which included various cardiac conduction and structural traits such as bradyarrhythmia, AF, atrioventricular pre-excitation, heart failure, cardiomyopathy, and congenital heart disease. We ascertained disease status based on data from baseline interviews, hospital diagnosis codes (ICD-9 and ICD-10), cause of death codes

626 (ICD-10), and operation codes. Details of individual selections and disease definitions are  
627 described in **Supplementary Table 23**.

628 We tested the PRSs for association with cardiovascular conditions using logistic regression.  
629 We adjusted for enrolled age, sex, genotyping array, and phenotype-related principal components  
630 of ancestry. Given correlation between traits, we did not establish a pre-specified significance  
631 threshold for the analysis and report nominal associations ( $P < 0.05$ ).

632

## 633 Tables

634 **Table 1** Novel genome-wide significant loci associated with PR interval (N = 149).

| Locus ID                            | Nearest gene(s)         | rsID        | Chr | Position  | EA/OA | EAF  | N      | Beta | SE   | P                     |
|-------------------------------------|-------------------------|-------------|-----|-----------|-------|------|--------|------|------|-----------------------|
| <b>Multi-ancestry meta-analysis</b> |                         |             |     |           |       |      |        |      |      |                       |
| 1                                   | <i>HSPG2</i>            | rs7529220   | 1   | 22282619  | C/T   | 0.84 | 293050 | 0.58 | 0.09 | $2.1 \times 10^{-10}$ |
| 2                                   | <i>AIM1L</i>            | rs12031946  | 1   | 26679041  | C/T   | 0.13 | 293051 | 0.59 | 0.10 | $2.4 \times 10^{-9}$  |
| 3                                   | <i>MAP7D1</i>           | rs1475267   | 1   | 36620801  | G/C   | 0.16 | 293050 | 0.50 | 0.09 | $2.1 \times 10^{-8}$  |
| 4                                   | <i>EDN2</i>             | rs12751675  | 1   | 41955714  | G/A   | 0.75 | 293050 | 0.56 | 0.08 | $1.8 \times 10^{-13}$ |
| 5                                   | <i>SSBP3</i>            | rs603901    | 1   | 54741767  | T/C   | 0.58 | 293051 | 0.43 | 0.06 | $3.3 \times 10^{-11}$ |
| 6                                   | <i>NFIA</i>             | rs6587924   | 1   | 61895257  | A/C   | 0.49 | 293051 | 0.35 | 0.06 | $2.7 \times 10^{-8}$  |
| 7                                   | <i>CDC7</i>             | rs13447455  | 1   | 91966445  | A/G   | 0.64 | 293051 | 0.38 | 0.07 | $1.7 \times 10^{-8}$  |
| 8                                   | <i>GJA5</i>             | rs1692144   | 1   | 147281349 | C/T   | 0.79 | 293051 | 0.65 | 0.08 | $1.7 \times 10^{-16}$ |
| 9                                   | <i>DPT</i>              | rs531706    | 1   | 168692137 | C/G   | 0.28 | 293051 | 0.39 | 0.07 | $3.4 \times 10^{-8}$  |
| 10                                  | <i>PRRX1</i>            | rs61824886  | 1   | 170615660 | C/G   | 0.85 | 293051 | 0.67 | 0.09 | $6.2 \times 10^{-13}$ |
| 11                                  | <i>C1orf98</i>          | rs819636    | 1   | 200271408 | C/T   | 0.33 | 293051 | 0.38 | 0.07 | $1.7 \times 10^{-8}$  |
| 12                                  | <i>HLX</i>              | rs6678632   | 1   | 221138612 | T/C   | 0.44 | 293051 | 0.47 | 0.06 | $4.9 \times 10^{-13}$ |
| 13                                  | <i>ADCK3</i>            | rs3768419   | 1   | 227173477 | C/G   | 0.48 | 291546 | 0.49 | 0.06 | $1.6 \times 10^{-14}$ |
| 14                                  | <i>SIPA1L2</i>          | rs1285678   | 1   | 232712145 | A/G   | 0.47 | 287628 | 0.52 | 0.07 | $2.6 \times 10^{-15}$ |
| 15                                  | <i>RYR2</i>             | rs10802580  | 1   | 237194922 | G/A   | 0.76 | 286413 | 0.45 | 0.08 | $6.9 \times 10^{-9}$  |
| 16                                  | <i>SMYD3</i>            | rs28468565  | 1   | 246157144 | A/G   | 0.66 | 287628 | 0.49 | 0.07 | $8.9 \times 10^{-13}$ |
| 17                                  | <i>LINC01249</i>        | rs12616546  | 2   | 4824622   | A/G   | 0.68 | 293051 | 0.53 | 0.07 | $9.2 \times 10^{-15}$ |
| 18                                  | <i>STRN</i>             | rs17496249  | 2   | 37102249  | A/G   | 0.55 | 293051 | 0.64 | 0.06 | $1.4 \times 10^{-23}$ |
| 19                                  | <i>EML4</i>             | rs6728830   | 2   | 42537995  | C/A   | 0.96 | 291132 | 1.02 | 0.18 | $1.9 \times 10^{-8}$  |
| 20                                  | <i>EPAS1</i>            | rs11894252  | 2   | 46533376  | T/C   | 0.42 | 293047 | 0.45 | 0.06 | $2.3 \times 10^{-12}$ |
| 21                                  | <i>FBXO11</i>           | rs7588761   | 2   | 48150587  | T/C   | 0.07 | 288153 | 0.75 | 0.13 | $5.3 \times 10^{-9}$  |
| 22                                  | <i>SPTBN1</i>           | rs4519566   | 2   | 54824815  | G/A   | 0.79 | 293051 | 0.54 | 0.08 | $4.7 \times 10^{-12}$ |
| 23                                  | <i>LINC01812/C1D</i>    | rs7584373   | 2   | 68079211  | A/G   | 0.35 | 293051 | 0.38 | 0.07 | $1.5 \times 10^{-8}$  |
| 24                                  | <i>FHL2/LOC285000</i>   | rs13006682  | 2   | 106104856 | C/T   | 0.34 | 293051 | 0.51 | 0.07 | $6.7 \times 10^{-14}$ |
| 25                                  | <i>NCKAP5</i>           | rs17816356  | 2   | 134326085 | A/C   | 0.05 | 289723 | 0.96 | 0.16 | $7.9 \times 10^{-10}$ |
| 26                                  | <i>TEX41</i>            | rs76909456  | 2   | 145453968 | G/A   | 0.24 | 293051 | 0.48 | 0.08 | $1.8 \times 10^{-10}$ |
| 27                                  | <i>LINC01473/ZC3H15</i> | rs138711926 | 2   | 187033804 | G/A   | 0.04 | 280792 | 0.98 | 0.18 | $4.7 \times 10^{-8}$  |
| 28                                  | <i>SDPR</i>             | rs58577564  | 2   | 192723128 | A/T   | 0.10 | 291546 | 0.78 | 0.11 | $7.5 \times 10^{-13}$ |

| Locus ID                            | Nearest gene(s)                 | rsID        | Chr | Position  | EA/OA | EAf  | N      | Beta | SE   | P                     |
|-------------------------------------|---------------------------------|-------------|-----|-----------|-------|------|--------|------|------|-----------------------|
| <b>Multi-ancestry meta-analysis</b> |                                 |             |     |           |       |      |        |      |      |                       |
| 31                                  | <i>TMEM198</i>                  | rs13023533* | 2   | 220414019 | T/C   | 0.55 | 293051 | 0.41 | 0.06 | $1.1 \times 10^{-10}$ |
| 32                                  | <i>LSM3</i>                     | rs6442433   | 3   | 14275759  | C/G   | 0.79 | 291836 | 0.71 | 0.08 | $1.9 \times 10^{-19}$ |
| 33                                  | <i>THRB</i>                     | rs60325252  | 3   | 24465080  | C/T   | 0.71 | 293051 | 0.75 | 0.07 | $9.1 \times 10^{-27}$ |
| 34                                  | <i>TRAK1</i>                    | rs11921457  | 3   | 42103045  | T/G   | 0.81 | 292301 | 0.69 | 0.09 | $8.0 \times 10^{-16}$ |
| 35                                  | <i>LAMB2</i>                    | rs9865051*  | 3   | 49166069  | T/C   | 0.78 | 293051 | 0.49 | 0.08 | $3.7 \times 10^{-10}$ |
| 36                                  | <i>ADCY5</i>                    | rs1000368   | 3   | 123117165 | T/C   | 0.26 | 293051 | 0.43 | 0.07 | $2.5 \times 10^{-9}$  |
| 37                                  | <i>TSC22D2</i>                  | rs201481721 | 3   | 150176904 | D/I   | 0.03 | 223845 | 1.32 | 0.22 | $1.8 \times 10^{-9}$  |
| 38                                  | <i>RAP2B</i>                    | rs4680046   | 3   | 153000092 | T/C   | 0.49 | 293051 | 0.47 | 0.06 | $1.2 \times 10^{-13}$ |
| 40                                  | <i>FND3C3B</i>                  | rs4894803   | 3   | 171800256 | G/A   | 0.39 | 293046 | 0.49 | 0.07 | $1.8 \times 10^{-13}$ |
| 41                                  | <i>FGF12</i>                    | rs4687352   | 3   | 192373761 | A/C   | 0.41 | 293051 | 0.53 | 0.06 | $1.3 \times 10^{-16}$ |
| 42                                  | <i>DLG1</i>                     | rs143879787 | 3   | 196799232 | I/D   | 0.73 | 226107 | 0.51 | 0.08 | $1.4 \times 10^{-9}$  |
| 43                                  | <i>SRD5A3</i>                   | rs77422711  | 4   | 56123105  | A/G   | 0.02 | 273824 | 1.85 | 0.30 | $6.4 \times 10^{-10}$ |
| 44                                  | <i>LPHN3</i>                    | rs28540500  | 4   | 62409801  | C/G   | 0.38 | 293051 | 0.42 | 0.07 | $2.4 \times 10^{-10}$ |
| 45                                  | <i>FGF5</i>                     | rs36034102  | 4   | 81202048  | T/G   | 0.27 | 292217 | 0.43 | 0.07 | $3.5 \times 10^{-9}$  |
| 46                                  | <i>PDLIM5</i>                   | rs2172448   | 4   | 95506214  | A/G   | 0.55 | 288153 | 0.37 | 0.06 | $9.4 \times 10^{-9}$  |
| 48                                  | <i>SLC12A7</i>                  | rs4975572   | 5   | 1054197   | T/C   | 0.46 | 293051 | 0.62 | 0.07 | $5.5 \times 10^{-21}$ |
| 49                                  | <i>SUB1</i>                     | rs17441816  | 5   | 32629419  | G/A   | 0.29 | 293051 | 0.51 | 0.07 | $4.7 \times 10^{-13}$ |
| 50                                  | <i>HCN1</i>                     | rs10039283  | 5   | 45864843  | A/G   | 0.41 | 293051 | 0.64 | 0.06 | $3.2 \times 10^{-23}$ |
| 51                                  | <i>NR2F1</i>                    | rs4869412   | 5   | 92455655  | G/A   | 0.49 | 293051 | 0.40 | 0.06 | $2.3 \times 10^{-10}$ |
| 53                                  | <i>STARD4</i>                   | rs67968533  | 5   | 111046342 | C/T   | 0.09 | 293051 | 0.66 | 0.11 | $4.8 \times 10^{-9}$  |
| 54                                  | <i>LOC101927421/<br/>ZNF608</i> | rs12654442  | 5   | 124343851 | T/C   | 0.27 | 293051 | 0.46 | 0.07 | $2.8 \times 10^{-10}$ |
| 55                                  | <i>SLC27A6</i>                  | rs2577531   | 5   | 128299279 | C/T   | 0.59 | 293051 | 0.38 | 0.06 | $3.8 \times 10^{-9}$  |
| 56                                  | <i>FGF18</i>                    | rs78810186  | 5   | 170868622 | T/C   | 0.11 | 290821 | 0.74 | 0.10 | $1.4 \times 10^{-12}$ |
| 57                                  | <i>LINC01411</i>                | rs4868384   | 5   | 173779209 | T/A   | 0.47 | 290336 | 0.47 | 0.06 | $2.5 \times 10^{-13}$ |
| 58                                  | <i>DSP</i>                      | rs72825038  | 6   | 7527269   | A/G   | 0.09 | 293051 | 0.94 | 0.11 | $2.7 \times 10^{-16}$ |
| 59                                  | <i>DEK</i>                      | rs214502    | 6   | 18227546  | A/C   | 0.58 | 291546 | 0.42 | 0.07 | $9.9 \times 10^{-11}$ |
| 60                                  | <i>HDGFL1</i>                   | rs6922960   | 6   | 22570189  | C/T   | 0.28 | 291546 | 0.61 | 0.07 | $5.6 \times 10^{-18}$ |
| 61                                  | <i>LRRC16A</i>                  | rs139915396 | 6   | 25351477  | I/D   | 0.10 | 226107 | 0.69 | 0.13 | $4.2 \times 10^{-8}$  |
| 62                                  | <i>CDKN1A</i>                   | rs730506    | 6   | 36645968  | C/G   | 0.20 | 293051 | 0.62 | 0.08 | $6.5 \times 10^{-15}$ |
| 63                                  | <i>TFEB</i>                     | rs1015149   | 6   | 41658889  | T/C   | 0.47 | 293051 | 0.45 | 0.06 | $1.6 \times 10^{-12}$ |
| 64                                  | <i>RCAN2</i>                    | rs871728    | 6   | 46452619  | C/T   | 0.42 | 293051 | 0.52 | 0.07 | $1.3 \times 10^{-15}$ |



| Locus ID                            | Nearest gene(s)              | rsID        | Chr | Position  | EA/OA | EAF  | N      | Beta | SE   | P                     |
|-------------------------------------|------------------------------|-------------|-----|-----------|-------|------|--------|------|------|-----------------------|
| <b>Multi-ancestry meta-analysis</b> |                              |             |     |           |       |      |        |      |      |                       |
| 65                                  | <i>LOC101927686</i>          | rs111739590 | 6   | 113978255 | C/T   | 0.81 | 293051 | 0.50 | 0.08 | $1.5 \times 10^{-9}$  |
| 66                                  | <i>TCF21</i>                 | rs12190287  | 6   | 134214525 | G/C   | 0.37 | 290979 | 0.43 | 0.07 | $2.9 \times 10^{-10}$ |
| 67                                  | <i>RP1-155D22.1</i>          | rs206708    | 6   | 164532059 | A/T   | 0.70 | 293051 | 0.47 | 0.07 | $1.9 \times 10^{-11}$ |
| 68                                  | <i>GET4</i>                  | rs10226357  | 7   | 925949    | G/A   | 0.59 | 293050 | 0.39 | 0.07 | $3.1 \times 10^{-9}$  |
| 69                                  | <i>DGKB</i>                  | rs56352403  | 7   | 14453835  | G/A   | 0.64 | 291623 | 0.56 | 0.07 | $1.4 \times 10^{-16}$ |
| 70                                  | <i>PRPS1L1</i>               | rs6961768   | 7   | 18040476  | A/C   | 0.43 | 293051 | 0.38 | 0.06 | $3.0 \times 10^{-9}$  |
| 71                                  | <i>DNAH11</i>                | rs62441680* | 7   | 21622494  | C/T   | 0.17 | 293051 | 0.62 | 0.08 | $2.3 \times 10^{-13}$ |
| 72                                  | <i>ELMO1</i>                 | rs4720244   | 7   | 37398113  | C/G   | 0.64 | 293051 | 0.42 | 0.07 | $3.6 \times 10^{-10}$ |
| 73                                  | <i>SEMA3A</i>                | rs62472627  | 7   | 83998676  | C/T   | 0.14 | 293051 | 0.61 | 0.09 | $6.7 \times 10^{-11}$ |
| 74                                  | <i>CHRM2</i>                 | rs1424569   | 7   | 136569416 | C/T   | 0.53 | 293051 | 0.36 | 0.07 | $4.6 \times 10^{-8}$  |
| 75                                  | <i>DLC1</i>                  | rs1188285   | 8   | 13130478  | C/T   | 0.56 | 293050 | 0.45 | 0.06 | $2.4 \times 10^{-12}$ |
| 76                                  | <i>MTUS1</i>                 | rs4921804   | 8   | 17550623  | G/A   | 0.63 | 289672 | 0.39 | 0.07 | $4.4 \times 10^{-9}$  |
| 77                                  | <i>XPO7</i>                  | rs56317071  | 8   | 21775838  | C/G   | 0.12 | 293050 | 0.57 | 0.10 | $1.2 \times 10^{-8}$  |
| 78                                  | <i>RBPM5</i>                 | rs4545054   | 8   | 30302465  | C/T   | 0.49 | 293050 | 0.36 | 0.06 | $2.0 \times 10^{-8}$  |
| 80                                  | <i>RP11-1082L8.3</i>         | rs35006907  | 8   | 125859817 | A/C   | 0.31 | 293050 | 0.48 | 0.07 | $1.6 \times 10^{-12}$ |
| 81                                  | <i>PTK2</i>                  | rs10106406  | 8   | 142006198 | C/G   | 0.45 | 282729 | 0.40 | 0.07 | $1.4 \times 10^{-9}$  |
| 82                                  | <i>TRPM3</i>                 | rs6560168   | 9   | 73482647  | T/A   | 0.45 | 292407 | 0.45 | 0.06 | $2.2 \times 10^{-12}$ |
| 83                                  | <i>SPATA31D5P/<br/>RASEF</i> | rs7043482   | 9   | 85135915  | A/C   | 0.65 | 293050 | 0.42 | 0.07 | $8.3 \times 10^{-10}$ |
| 84                                  | <i>ASTN2</i>                 | rs1407243   | 9   | 119314851 | C/T   | 0.60 | 293051 | 0.37 | 0.06 | $9.1 \times 10^{-9}$  |
| 85                                  | <i>PLPP7</i>                 | rs4584185   | 9   | 134203545 | C/T   | 0.45 | 278484 | 0.48 | 0.07 | $6.1 \times 10^{-13}$ |
| 86                                  | <i>BEND7</i>                 | rs7916672   | 10  | 13534234  | T/C   | 0.58 | 293051 | 0.35 | 0.06 | $3.8 \times 10^{-8}$  |
| 87                                  | <i>CCDC7</i>                 | rs2947080   | 10  | 32847962  | G/C   | 0.64 | 293051 | 0.41 | 0.07 | $4.6 \times 10^{-10}$ |
| 88                                  | <i>CEFIP</i>                 | rs10776558* | 10  | 50510406  | C/T   | 0.53 | 293050 | 0.42 | 0.06 | $2.8 \times 10^{-11}$ |
| 89                                  | <i>TMEM26</i>                | rs74813029  | 10  | 63194576  | A/G   | 0.17 | 293051 | 0.54 | 0.09 | $3.3 \times 10^{-10}$ |
| 90                                  | <i>COL13A1</i>               | rs2642608   | 10  | 71559723  | T/C   | 0.27 | 293051 | 0.42 | 0.07 | $3.8 \times 10^{-9}$  |
| 91                                  | <i>ZMIZ1</i>                 | rs1769758   | 10  | 80898969  | T/G   | 0.50 | 267464 | 0.50 | 0.07 | $1.0 \times 10^{-11}$ |
| 92                                  | <i>U3</i>                    | rs117443987 | 10  | 88509088  | T/A   | 0.92 | 288153 | 1.00 | 0.12 | $6.1 \times 10^{-17}$ |
| 93                                  | <i>ADRB1</i>                 | rs67234920  | 10  | 115782061 | G/A   | 0.89 | 293051 | 0.67 | 0.11 | $2.3 \times 10^{-10}$ |
| 94                                  | <i>FGFR2</i>                 | rs2912774   | 10  | 123348662 | T/G   | 0.42 | 288153 | 0.48 | 0.07 | $1.3 \times 10^{-13}$ |
| 95                                  | <i>MPPED2</i>                | rs553951    | 11  | 30432176  | C/T   | 0.73 | 293051 | 0.39 | 0.07 | $3.8 \times 10^{-8}$  |
| 96                                  | <i>WT1</i>                   | rs11031737  | 11  | 32372772  | G/A   | 0.52 | 293051 | 0.35 | 0.06 | $4.5 \times 10^{-8}$  |

| Locus ID                            | Nearest gene(s)                    | rsID        | Chr | Position  | EA/OA | EA   | N      | Beta | SE   | P                     |
|-------------------------------------|------------------------------------|-------------|-----|-----------|-------|------|--------|------|------|-----------------------|
| <b>Multi-ancestry meta-analysis</b> |                                    |             |     |           |       |      |        |      |      |                       |
| 97                                  | <i>PCNXL3</i>                      | rs12801636  | 11  | 65391317  | A/G   | 0.24 | 293051 | 0.41 | 0.07 | $4.1 \times 10^{-8}$  |
| 98                                  | <i>CRYAB</i>                       | rs12808601  | 11  | 111776066 | G/A   | 0.70 | 293050 | 0.51 | 0.07 | $3.1 \times 10^{-13}$ |
| 99                                  | <i>USP28</i>                       | rs144789148 | 11  | 113666335 | G/A   | 0.05 | 290495 | 0.96 | 0.17 | $6.4 \times 10^{-9}$  |
| 100                                 | <i>PDE3A</i>                       | rs10770646  | 12  | 20544361  | T/C   | 0.79 | 288153 | 0.53 | 0.08 | $6.4 \times 10^{-11}$ |
| 101                                 | <i>SSPN</i>                        | rs78518764  | 12  | 26306484  | T/C   | 0.86 | 293051 | 0.61 | 0.10 | $2.1 \times 10^{-10}$ |
| 102                                 | <i>ARID2</i>                       | rs76611452  | 12  | 46209520  | T/C   | 0.04 | 286416 | 1.19 | 0.19 | $1.5 \times 10^{-10}$ |
| 103                                 | <i>SRGAP1</i>                      | rs17099893  | 12  | 64283014  | A/G   | 0.06 | 291836 | 0.95 | 0.14 | $9.9 \times 10^{-12}$ |
| 104                                 | <i>MIR6074</i>                     | rs4026608   | 12  | 66394664  | T/C   | 0.62 | 293051 | 0.38 | 0.07 | $6.5 \times 10^{-9}$  |
| 105                                 | <i>SLC6A15</i>                     | rs10862858  | 12  | 84806298  | A/G   | 0.43 | 293051 | 0.46 | 0.06 | $1.1 \times 10^{-12}$ |
| 106                                 | <i>HCFC2</i>                       | rs2629745   | 12  | 104503806 | A/G   | 0.88 | 293051 | 0.69 | 0.10 | $1.7 \times 10^{-12}$ |
| 107                                 | <i>RIC8B</i>                       | rs3759310   | 12  | 107166122 | G/C   | 0.36 | 293051 | 0.56 | 0.07 | $4.5 \times 10^{-17}$ |
| 108                                 | <i>UBE3B</i>                       | rs2004359*  | 12  | 109976893 | G/T   | 0.47 | 291836 | 0.42 | 0.06 | $5.0 \times 10^{-11}$ |
| 109                                 | <i>TESC</i>                        | rs7972416   | 12  | 117491824 | A/G   | 0.66 | 293051 | 0.45 | 0.07 | $1.8 \times 10^{-11}$ |
| 110                                 | <i>FREM2</i>                       | rs9634754*  | 13  | 39261151  | G/T   | 0.69 | 293051 | 0.41 | 0.07 | $4.4 \times 10^{-9}$  |
| 111                                 | <i>FGF14</i>                       | rs9513995   | 13  | 102878269 | T/C   | 0.74 | 287628 | 0.50 | 0.07 | $2.1 \times 10^{-11}$ |
| 112                                 | <i>ARHGEF40</i>                    | rs12885183  | 14  | 21545230  | G/A   | 0.22 | 283907 | 0.49 | 0.08 | $8.5 \times 10^{-10}$ |
| 113                                 | <i>RP11-562L8.1</i>                | rs7146955   | 14  | 29750244  | G/A   | 0.59 | 293051 | 0.44 | 0.06 | $6.7 \times 10^{-12}$ |
| 114                                 | <i>AKAP6</i>                       | rs3784192   | 14  | 32923336  | A/G   | 0.20 | 293051 | 0.55 | 0.08 | $3.0 \times 10^{-11}$ |
| 115                                 | <i>NFKBIA</i>                      | rs8904      | 14  | 35871217  | G/A   | 0.63 | 287252 | 0.40 | 0.07 | $1.6 \times 10^{-9}$  |
| 116                                 | <i>SYNE2</i>                       | rs1255908   | 14  | 64457638  | T/G   | 0.69 | 291546 | 0.52 | 0.07 | $6.0 \times 10^{-14}$ |
| 117                                 | <i>FLRT2</i>                       | rs17712080  | 14  | 86041160  | G/A   | 0.75 | 293050 | 0.47 | 0.07 | $2.0 \times 10^{-10}$ |
| 118                                 | <i>RP11-1070N10.3</i>              | rs179145    | 14  | 95983975  | A/G   | 0.38 | 287627 | 0.41 | 0.07 | $5.2 \times 10^{-10}$ |
| 119                                 | <i>MARK3</i>                       | rs3759579   | 14  | 103851272 | A/G   | 0.41 | 287627 | 0.42 | 0.07 | $1.2 \times 10^{-10}$ |
| 120                                 | <i>RBPM2</i>                       | rs3935716*  | 15  | 65035979  | A/G   | 0.15 | 293051 | 0.61 | 0.10 | $1.2 \times 10^{-10}$ |
| 121                                 | <i>CORO2B</i>                      | rs11330601  | 15  | 69021265  | I/D   | 0.55 | 222818 | 0.43 | 0.08 | $1.4 \times 10^{-8}$  |
| 122                                 | <i>HCN4</i>                        | rs8039168   | 15  | 73664723  | A/T   | 0.83 | 293051 | 0.60 | 0.09 | $2.0 \times 10^{-12}$ |
| 123                                 | <i>ALPK3</i>                       | rs6496452   | 15  | 85372645  | A/T   | 0.55 | 287628 | 0.55 | 0.06 | $1.3 \times 10^{-17}$ |
| 124                                 | <i>LINC00924/NR2F2</i>             | rs62008078  | 15  | 96460899  | C/T   | 0.44 | 285649 | 0.48 | 0.07 | $4.4 \times 10^{-13}$ |
| 125                                 | <i>SPSB3</i>                       | rs35816944* | 16  | 1828030   | G/A   | 0.99 | 247100 | 2.70 | 0.44 | $1.3 \times 10^{-9}$  |
| 126                                 | <i>SRL</i>                         | rs79321945  | 16  | 4282284   | C/A   | 0.78 | 293051 | 0.50 | 0.08 | $2.1 \times 10^{-10}$ |
| 128                                 | <i>LOC101927480/<br/>LINC02140</i> | rs1186818   | 16  | 54598337  | G/A   | 0.24 | 293051 | 0.43 | 0.07 | $9.0 \times 10^{-9}$  |

| Locus ID                            | Nearest gene(s)       | rsID        | Chr | Position  | EA/OA | EA   | N      | Beta | SE   | P                     |
|-------------------------------------|-----------------------|-------------|-----|-----------|-------|------|--------|------|------|-----------------------|
| <b>Multi-ancestry meta-analysis</b> |                       |             |     |           |       |      |        |      |      |                       |
| 129                                 | <i>CNOT1</i>          | rs7199856*  | 16  | 58584772  | G/T   | 0.26 | 292217 | 0.56 | 0.07 | $8.6 \times 10^{-15}$ |
| 130                                 | <i>LINC01082/IRF8</i> | rs904199    | 16  | 86184639  | G/A   | 0.08 | 287629 | 0.73 | 0.12 | $7.9 \times 10^{-10}$ |
| 131                                 | <i>ZFPM1</i>          | rs28634651  | 16  | 88553198  | T/C   | 0.61 | 261197 | 0.51 | 0.07 | $2.1 \times 10^{-12}$ |
| 132                                 | <i>MINK1</i>          | rs7774      | 17  | 4801163   | A/C   | 0.33 | 293051 | 0.43 | 0.07 | $8.6 \times 10^{-10}$ |
| 133                                 | <i>EFCAB5</i>         | rs55866125* | 17  | 28312993  | T/C   | 0.52 | 293051 | 0.42 | 0.06 | $3.2 \times 10^{-11}$ |
| 134                                 | <i>CACNA1G</i>        | rs757416    | 17  | 48666064  | T/C   | 0.63 | 293051 | 0.69 | 0.07 | $2.5 \times 10^{-25}$ |
| 135                                 | <i>CSHL1</i>          | rs2006122   | 17  | 61987405  | T/A   | 0.27 | 293051 | 0.42 | 0.07 | $5.8 \times 10^{-9}$  |
| 136                                 | <i>PRKCA</i>          | rs9909004   | 17  | 64306133  | C/T   | 0.42 | 291623 | 0.38 | 0.06 | $2.9 \times 10^{-9}$  |
| 138                                 | <i>AC100791.2</i>     | rs745570*   | 17  | 77781725  | G/A   | 0.53 | 293051 | 0.35 | 0.06 | $3.4 \times 10^{-8}$  |
| 139                                 | <i>CDH2</i>           | rs11083300  | 18  | 26339589  | G/C   | 0.46 | 293050 | 0.35 | 0.06 | $3.8 \times 10^{-8}$  |
| 140                                 | <i>GAREM</i>          | rs982521    | 18  | 30029141  | C/T   | 0.18 | 293050 | 0.75 | 0.09 | $1.7 \times 10^{-18}$ |
| 141                                 | <i>DTNA</i>           | rs1786595   | 18  | 32399259  | C/T   | 0.74 | 293050 | 0.47 | 0.07 | $6.9 \times 10^{-11}$ |
| 142                                 | <i>CCBE1</i>          | rs12961264  | 18  | 57138957  | C/T   | 0.23 | 293050 | 0.51 | 0.08 | $1.1 \times 10^{-11}$ |
| 143                                 | <i>STK11</i>          | rs3795063   | 19  | 1217560   | C/G   | 0.65 | 268324 | 0.49 | 0.08 | $7.3 \times 10^{-11}$ |
| 144                                 | <i>ZNF358</i>         | rs113394178 | 19  | 7581244   | A/C   | 0.60 | 212667 | 0.46 | 0.08 | $2.1 \times 10^{-8}$  |
| 145                                 | <i>TMEM59L</i>        | rs111551996 | 19  | 18733355  | G/T   | 0.95 | 290902 | 0.95 | 0.16 | $8.0 \times 10^{-10}$ |
| 146                                 | <i>RNF24/SMOX</i>     | rs16989138  | 20  | 4031653   | G/A   | 0.43 | 291546 | 0.53 | 0.07 | $7.1 \times 10^{-16}$ |
| 147                                 | <i>KIAA1755</i>       | rs6023939   | 20  | 36832526  | C/A   | 0.54 | 293051 | 0.44 | 0.06 | $6.7 \times 10^{-12}$ |
| 148                                 | <i>DERL3</i>          | rs2070464   | 22  | 24183875  | G/A   | 0.38 | 291836 | 0.54 | 0.07 | $6.2 \times 10^{-16}$ |
| 149                                 | <i>PHF5A</i>          | rs9607805   | 22  | 41854446  | T/C   | 0.70 | 287628 | 0.42 | 0.07 | $5.6 \times 10^{-9}$  |
| <b>European meta-analysis</b>       |                       |             |     |           |       |      |        |      |      |                       |
| 29                                  | <i>BMPR2</i>          | rs2103208   | 2   | 203373030 | G/A   | 0.49 | 271570 | 0.36 | 0.07 | $4.8 \times 10^{-8}$  |
| 30                                  | <i>AC007563.5</i>     | rs6435953   | 2   | 217628087 | C/T   | 0.16 | 271570 | 0.51 | 0.09 | $2.1 \times 10^{-8}$  |
| 39                                  | <i>MLF1</i>           | rs6799180*  | 3   | 158333891 | A/G   | 0.47 | 271570 | 0.37 | 0.07 | $2.2 \times 10^{-8}$  |
| 47                                  | <i>MYOZ2</i>          | rs78277783  | 4   | 120070079 | A/T   | 0.27 | 266672 | 0.42 | 0.08 | $2.1 \times 10^{-8}$  |
| 52                                  | <i>FER</i>            | rs6889995   | 5   | 108210304 | G/A   | 0.22 | 266672 | 0.44 | 0.08 | $4.3 \times 10^{-8}$  |
| 79                                  | <i>AZIN1</i>          | rs565720    | 8   | 103914366 | A/C   | 0.77 | 271570 | 0.44 | 0.08 | $3.1 \times 10^{-8}$  |
| 127                                 | <i>MYH11</i>          | rs72772025  | 16  | 15834729  | T/C   | 0.27 | 269591 | 0.41 | 0.08 | $3.5 \times 10^{-8}$  |
| 137                                 | <i>CASKIN2</i>        | rs7501873   | 17  | 73505172  | G/A   | 0.22 | 271570 | 0.45 | 0.08 | $4.9 \times 10^{-8}$  |

There was no evidence of heterogeneity for any of the newly identified loci across individual studies ( $P_{\text{heterogeneity}} \geq 0.001$ ) or across ancestry groups ( $P_{\text{heterogeneity}} > 0.01$ ).

Locus ID: unique locus identifier; Nearest gene(s): Nearest annotated gene(s) to the lead variant; rsID, variant accession number; Chr, chromosome; Position, physical position in build 37; EA, effect allele; OA, other allele; EAF, effect allele frequency; N, total sample size analyzed; beta, effect estimate in milliseconds; SE, standard error; P, P-value.

\* Missense variant or variant in high LD ( $r^2 > 0.8$ ) with missense or splice site variant(s).

644 **Figures**

645 **Figure 1** Overview of the study design.

646 Figure includes overview of contributing studies, single-stage discovery approach, and downstream bioinformatics and *in silico*  
647 annotations we performed to link variants to genes, and polygenic risk score analysis to link variants to cardiovascular disease risk.

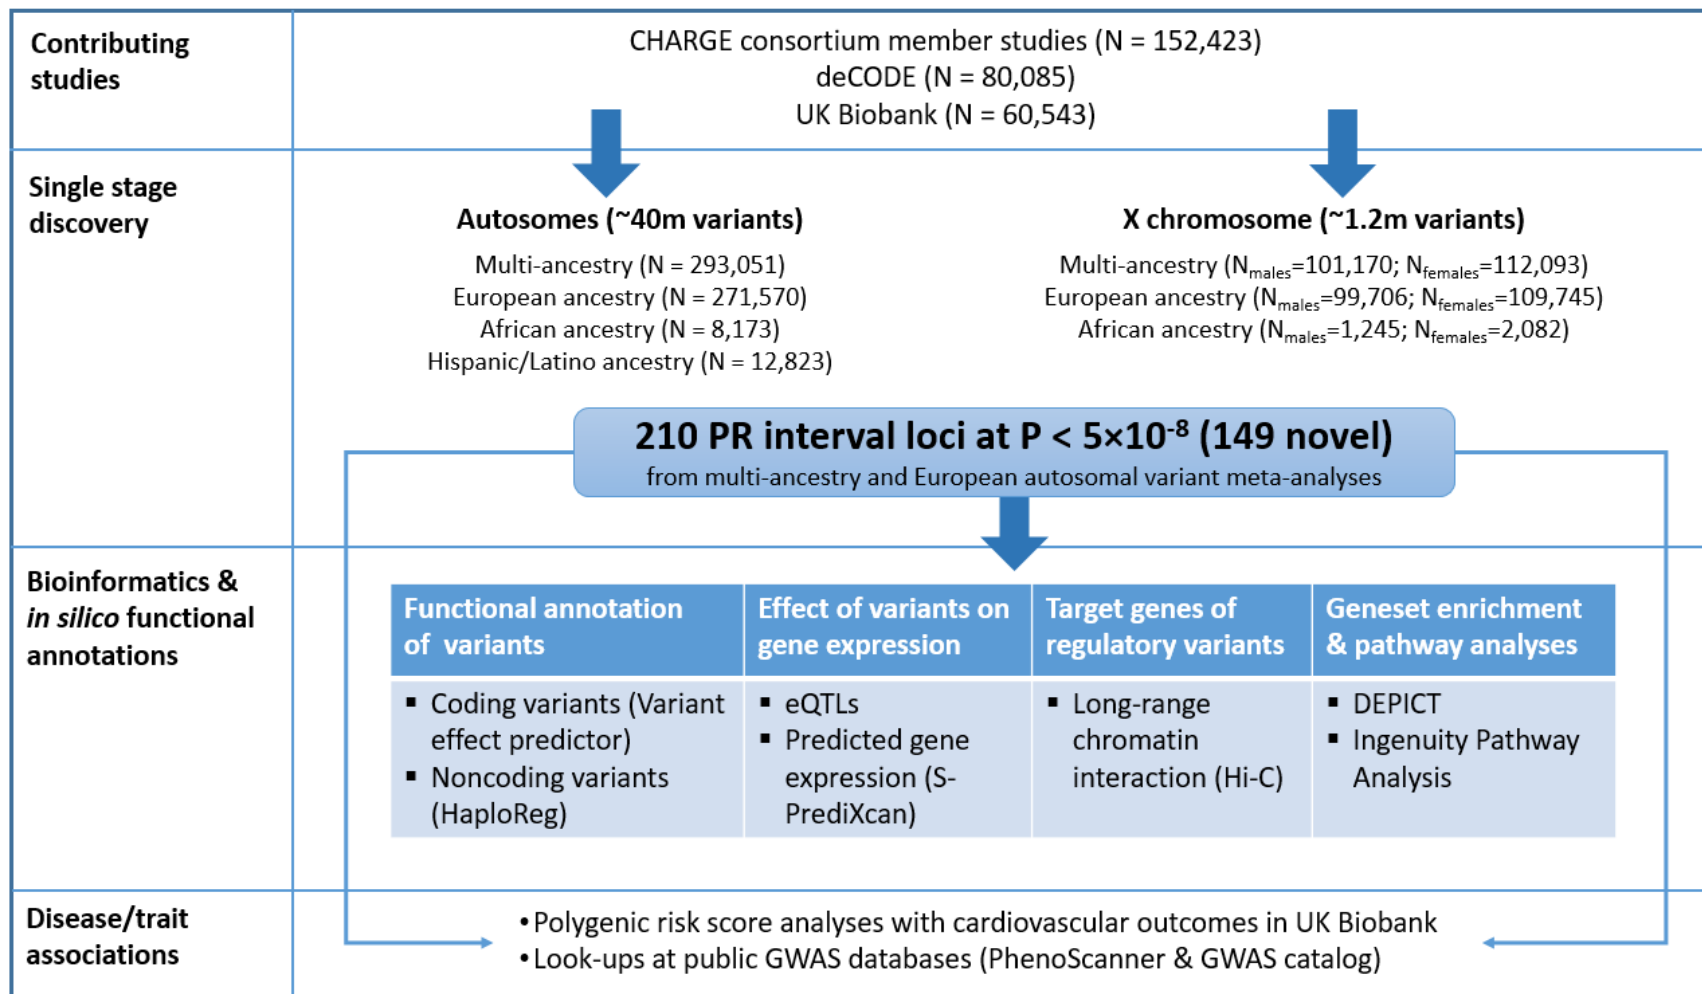

648

649

650 **Figure 2** Manhattan plot of the multi-ancestry meta-analysis for PR interval. P values are plotted on the  $-\log_{10}$  scale for all variants  
651 present in at least 60% of the maximum sample size. Associations of genome-wide significant ( $P < 5 \times 10^{-8}$ ) variants at novel ( $N = 141$ )  
652 and previously reported loci ( $N = 61$ ) are plotted in dark and light blue colours respectively.

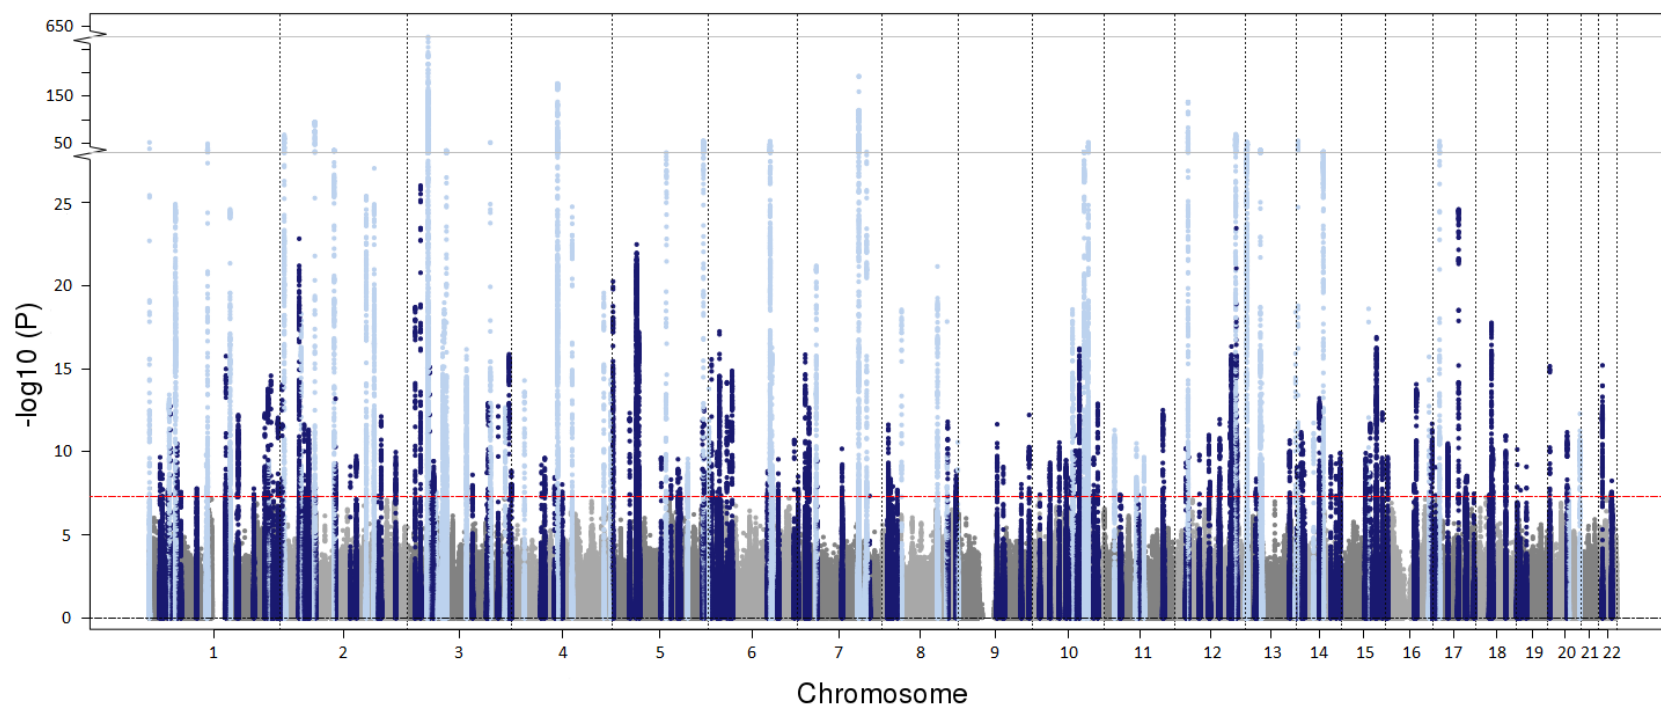

653

654

# Figure 3 Plausible candidate genes of PR interval from S-PrediXcan

Diagram of standard electrocardiographic intervals and the heart. The electrocardiographic features are illustratively aligned with the corresponding cardiac conduction system structures (orange) reflected on the tracing. The PR interval (labeled) indicates conduction through the atria, atrioventricular node, His bundle, and Purkinje fibers. Right: The tables show 120 genes whose expression in the left ventricle (N=272) or right atrial appendage (N=264) was associated with PR interval duration in a transcriptome-wide analysis using S-PrediXcan and GTEx v7. Displayed genes include those with significant associations after Bonferroni correction for all tested genes at the two tissues with a  $P < 4.4 \times 10^{-6}$  ( $=0.05/(5,977+5,366)$ ). Longer PR intervals were associated with increased predicted expression of 59 genes (blue) and reduced expression of 61 genes (orange).

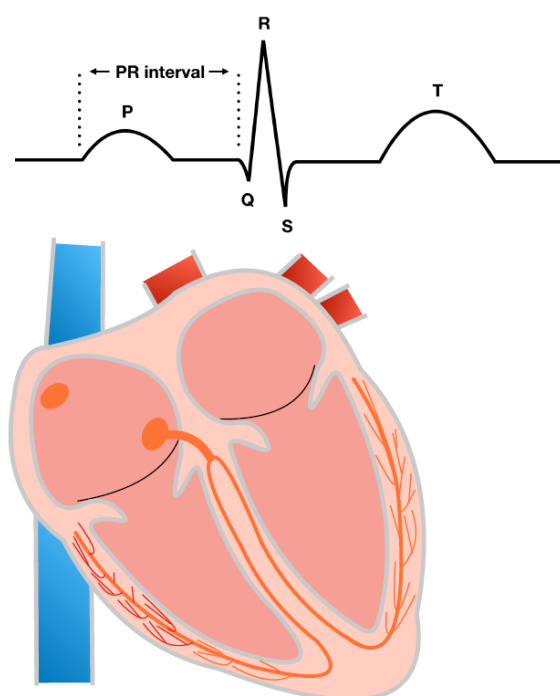

## Increased gene expression

|            |          |                |            |
|------------|----------|----------------|------------|
| ACP6       | DEK      | LRCH1          | SNX1       |
| AL590822.1 | DNM1P51  | MSTO2P         | SYNPO2L    |
| ALPK3      | EDN2     | MYO15A         | TCTN3      |
| ATP5D      | EEFSEC   | NPIPA5         | TMEM182    |
| BMPR1A     | EF-1     | NUDT13         | TMEM72     |
| CEP1       | FADS1    | PDZRN3         | TPMT       |
| C11orf1    | FAM211B  | PHACTR1        | TRAK1      |
| CALHM2     | FAT1     | RP11-29H23.5   | TRIP4      |
| CAMK2D     | FKBP7    | RP11-399K21.11 | TTC18      |
| CCDC36     | FUT11    | RP11-3B7.1     | VDAC2      |
| CDH13      | GBAP1    | RP4-764O22.2   | VPREB3     |
| CEP85      | HMGAI1P5 | RPSA           | XIRP1      |
| CFDP1      | IFRD2    | SLC25A26       | ZCCHC24    |
| CHRM2      | KCND3    | SLC6A6         | ZNF503-AS1 |
| DAG1       | KDM1B    | SLK            |            |

## Reduced gene expression

|            |           |                |          |
|------------|-----------|----------------|----------|
| ABHD12     | HCN1      | NPIPA1         | SH3PXD2A |
| AC011747.4 | IL17D     | PHLDB2         | SLC2A11  |
| AC103965.1 | IL25      | PLCD1          | SMARCB1  |
| AGAP5      | KP-3      | PPAPDC3        | SPATA20  |
| BEND7      | LINC00964 | QRICH1         | SPTBN1   |
| C1orf86    | MALAT1    | RCAN2          | SSBP3    |
| CAB39L     | MEI1      | RP11-1070N10.3 | SSXP10   |
| CBX8       | MLF1      | RP11-182J1.16  | STRN     |
| CMTM5      | MMP11     | RP11-344N10.5  | SYNE2    |
| CSPG4P11   | MRPL37    | RP11-379F4.7   | SYPL2    |
| DDX42      | MTSS1     | RP11-397E7.4   | TFEC     |
| DNAH11     | MYBPHL    | RP11-724N1.1   | THRB     |
| EMB        | MYOZ1     | SCN5A / SCN10A | UBE3B    |
| GBF1       | NDST2     | SELM           | WDR73    |
| GORASP1    | NEURL     | SH3D21         | ZHX1     |



667 **Figure 4** Bubble plot of phenome-wide association analysis of multi-ancestry PR interval polygenic risk score.

668 Polygenic risk score was derived from the multi-ancestry meta-analysis results. Orange circles indicate that higher polygenic risk score of  
669 prolonged PR interval is associated with an increased risk of the condition, whereas blue circles indicate that higher score is associated with lower  
670 risks. The darkness of the colour reflects the effect size (odds ratio, OR) changes per 1 standard deviation increment of the polygenic risk score.  
671 Given correlation between traits, we did not establish a pre-specified significance threshold for the analysis and report nominal associations ( $P <$   
672 0.05).

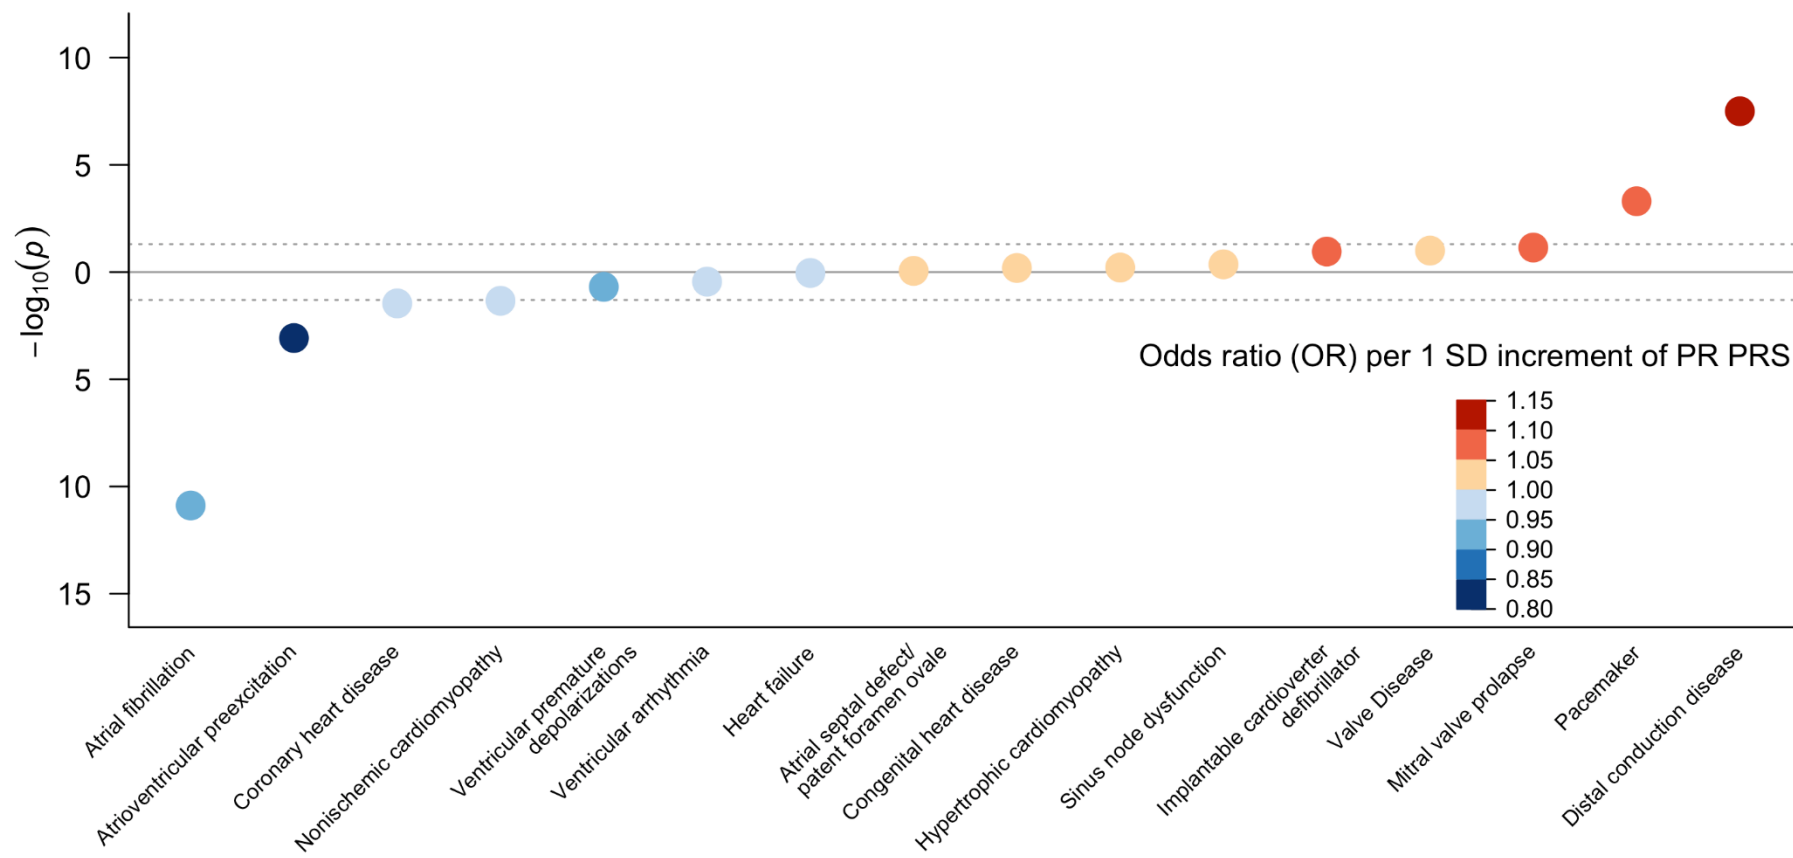

673

674

675 **Figure 5** Candidate genes in PR interval loci encoding proteins involved in cardiac muscle cytoskeleton. Candidate genes or encoded proteins are  
676 indicated by a star symbol in the figure and listed in the table. More information about the genes is provided in Supplementary Tables 18-19.  
677 \*Novel locus, # genome-wide significant locus in transformed trait meta-analysis.  
678 <sup>1</sup> Missense variant; <sup>2</sup> Nearest gene to the lead variant; <sup>3</sup> Gene within the region ( $r^2 > 0.5$ ); <sup>4</sup> Variant(s) in the locus are associated with gene expression  
679 in left ventricle and/or right atrial appendage; <sup>5</sup> Left ventricle best HiC locus interactor (RegulomeDB score  $\leq 2$ ); <sup>6</sup> Animal model; <sup>7</sup> Monogenic  
680 cardiovascular disease.

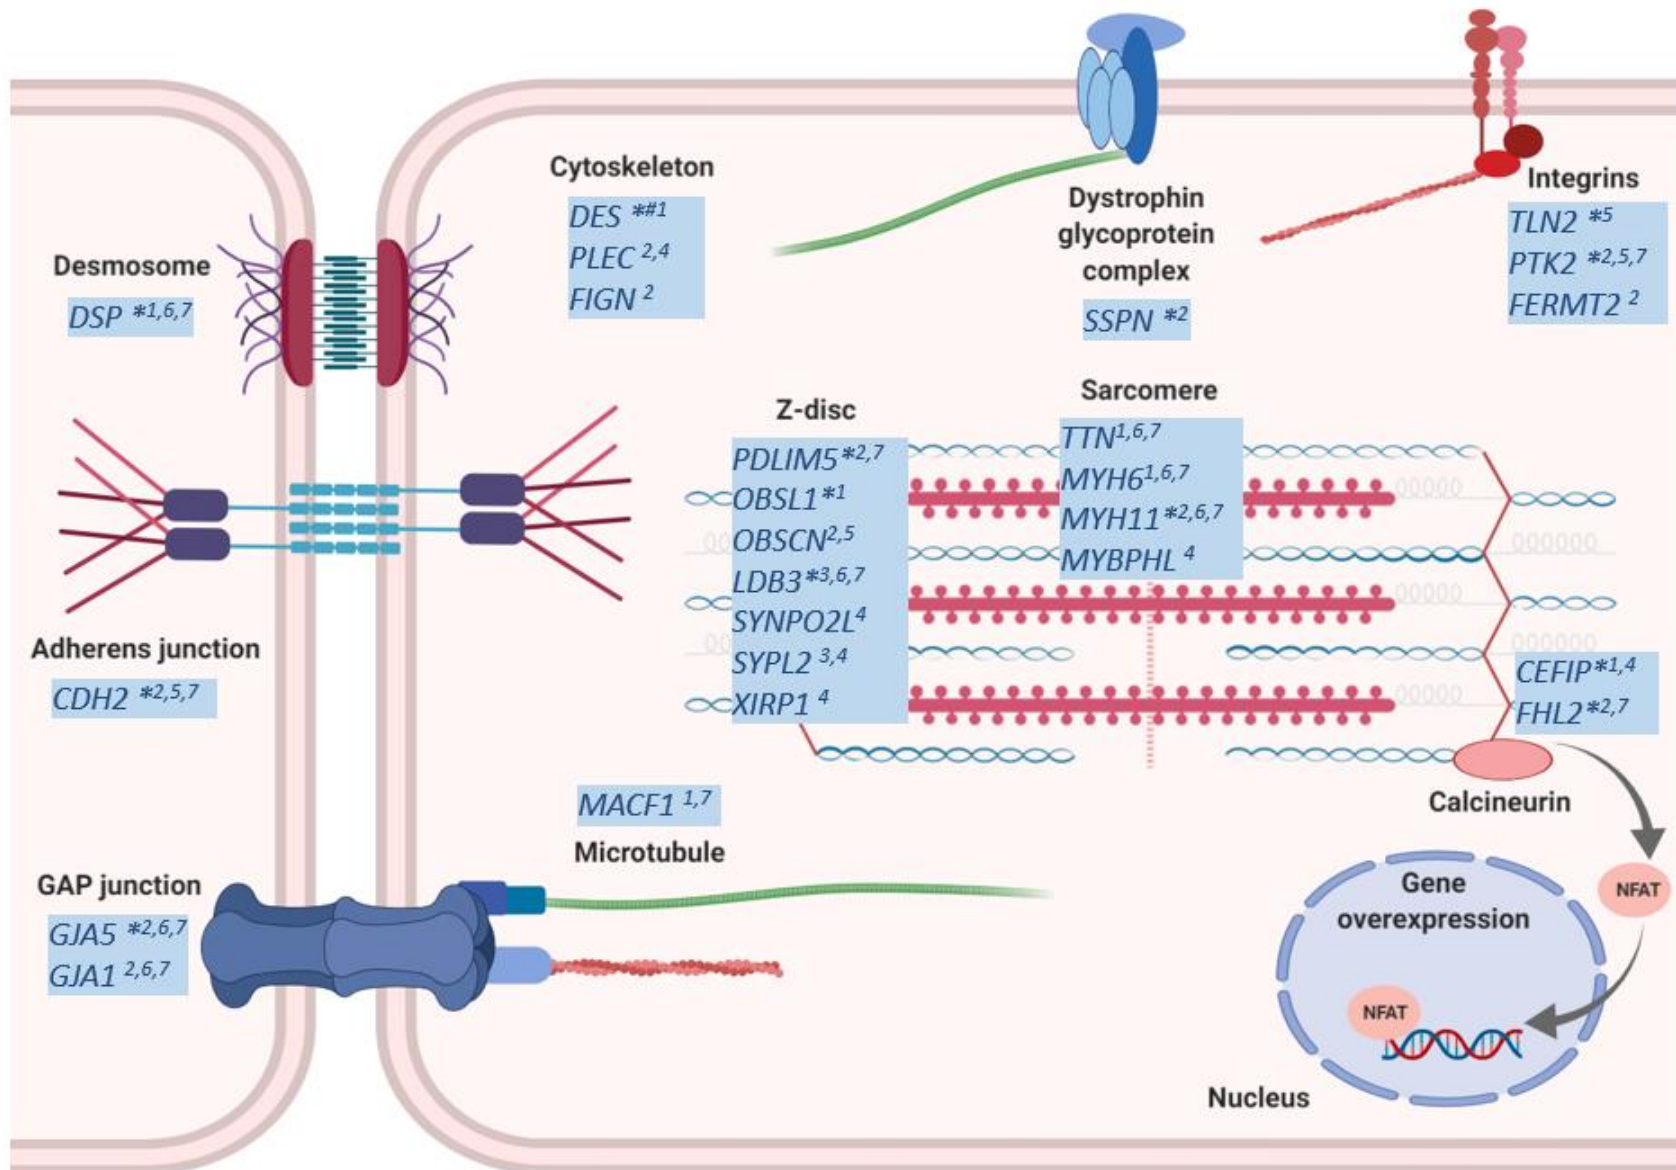

## 682 URLs

- 683 1000 Genome Project: <http://www.internationalgenome.org>
- 684 BOLT-LMM: <https://data.broadinstitute.org/alkesgroup/BOLT-LMM/>
- 685 DEPICT: <https://data.broadinstitute.org/mpg/depict/>
- 686 DGIdb: <http://www.dgldb.org>
- 687 EasyQC: <https://www.uni-regensburg.de/medizin/epidemiologie->
- 688 praeventivmedizin/genetische-epidemiologie/software/#
- 689 FORGE: <https://github.com/iandunham/Forge>
- 690 GCTA: <https://cnsgenomics.com/software/gcta/#Overview>
- 691 GTEx: <https://gtexportal.org/home/>
- 692 HRC: <http://www.haplotype-reference-consortium.org>
- 693 IMPUTE2: [http://mathgen.stats.ox.ac.uk/impute/impute\\_v2.html](http://mathgen.stats.ox.ac.uk/impute/impute_v2.html)
- 694 Ingenuity Pathway Analysis software:
- 695 <https://www.qiagenbioinformatics.com/products/ingenuity-pathway-analysis/>
- 696 International Mouse Phenotyping Consortium: <https://www.mousephenotype.org/>
- 697 IPA: <https://www.qiagenbioinformatics.com/products/ingenuity-pathway-analysis>
- 698 LocusZoom: <http://locuszoom.org/>
- 699 MACH: <http://csg.sph.umich.edu/abecasis/mach/tour/imputation.html>
- 700 METAL: <http://csg.sph.umich.edu/abecasis/metal/>
- 701 OMIM: <https://www.omim.org/>

702 RegulomeDB: <http://www.regulomedb.org>

703 S-PrediXcan: <https://github.com/hakyimlab/MetaXcan>

704 UK Biobank: <https://www.ukbiobank.ac.uk>

705

# 706 **Author contributions**

707 Interpreted results, writing and editing the manuscript: I.N., L.-C.W., S.A.L., and P.B.M.  
708 Conceptualisation and supervision of project: S.A.L. and P.B.M. Contributed  
709 to GWAS analysis plan: I.N., L.-C.W., H.R.W., Y.J., S.A.L., and P.B.M. Performed meta-  
710 analyses: I.N. and L.-C.W. Performed GCTA, heritability, geneset enrichment and pathway  
711 analyses, variant annotations: I.N. Performed polygenic risk score and gene expression  
712 analyses: S.H.C., M.D.C., and L.-C.W. Performed HiC analyses: I.N., M.R.B., B.M., and  
713 P.B.M. Performed gene literature review: I.N., L.-C.W., A.W.Hall, N.R.T., M.D.C., J.H.C.,  
714 J.J.C., A.T., Y.J., S.A.L., and P.B.M. Contributed to study specific GWAS by providing  
715 phenotype, genotype and performing data analyses: J.M., I.R., C.H., P.G., M.Concas, T.B.,  
716 O.P., I.K., E.T., N.M.A., R.P.S., M.F.L., A.L.P.R., A.M., V.Giedraitis, E.I., A.P.M., F.D.M.,  
717 L.F., M.G., A.A.Hicks, J.P.C., L.Lind, C.M.L., J.Sundström, N.J.S., C.P.N., M.B.R., S.U.,  
718 G.S., P.P.M., M.K., N.M., K.N., I.N., M.Caulfield, A.Dominiczak, S.P., M.E.M., J.R.O.,  
719 A.R.S., K.Ryan, D.C., L.R., S.Aeschbacher, S.Thériault, T.L., O.T.R., N.H., L.Lyytikäinen,  
720 J.F.W., P.K.J., C.L.K.B., H.C., C.M.v., J.A.K., A.I., P.L.H., L.-C.W., S.A.L., P.T.E., T.B.H.,  
721 L.J.L., A.V.S., V.Gudnason, E.P.B., R.J.F.L., G.N.N., M.H.P., A.C., H.M., J.W., M.Müller-  
722 Nurasyid, A.P., T.M., M.W., T.D.S., Y.J., M.Mangino, M.R., Y.J.V., P.H., N.V., K.Schramm,  
723 S.K., K.Strauch, M.F.S., B.L., C.R., D.F., M.J.C., M.Olesen, D.M.R., M.B.S., J.Smith, J.A.B.,  
724 M.L.B., J.C.B., B.M.P., N.S., K.Rice, C.P., P.P.P., A.De Grandi, C.F., J.W.J., I.F., P.W.M.,  
725 S.Trompet, S.W., M.D., S.B.F., U.V., A.S.Havulinna, A.J., K.Sääksjärvi, V.S., S.R.H., J.I.R.,  
726 X.G., H.J.L., J.Y., K.D.T., R.N., R.d., D.O.M., A.C.M., F.C., J.D., E.G.L., Y.Q., K.V.T.,  
727 E.J.B., D.L., H.L., C.H.N., K.L.L., A.D.M., D.J.P., B.H.Smith, B.H.Stricker, M.E.v, A.U.,  
728 J.H., R.D.J., U.P., A.P.R., E.A.W., C.K., E.B., D.E.A., G.B.E., A.A., E.Z.S., C.L.A., S.M.G.,  
729 K.F.K., C.C.L., A.A.S., A.S., S.Assa, M.A.S., M.Y.v., P.D.L., A.T., M.Orini, J.R., S.V.D.,

730 P.B.M., K.Stefansson, H.H., P.S., G.S., G.T., R.B.T., U.T., D.O.A., D.F.G. All authors read,

731 revised and approved the manuscript.

732



## Competing Interests

S.A.L. receives sponsored research support from Bristol Myers Squibb / Pfizer, Bayer AG, and Boehringer Ingelheim, and has consulted for Bristol Myers Squibb / Pfizer and Bayer AG. P.T.E. is supported by a grant from Bayer AG to the Broad Institute focused on the genetics and therapeutics of cardiovascular diseases. P.T.E. has also served on advisory boards or consulted for Bayer AG, Quest Diagnostics, and Novartis. M.J.C. is Chief Scientist for Genomics England, a UK Government company. B.M.P. serves on the DSMB of a clinical trial funded by Zoll LifeCor and on the Steering Committee of the Yale Open Data Access Project funded by Johnson & Johnson. V.S. has participated in a conference trip sponsored by Novo Nordisk and received a modest honorarium for participating in an advisory board meeting. K.Stefansson, H.H., P.S., G.S., G.T., R.B.T., U.T., D.O.A., D.F.G. are employed by deCODE genetics/Amgen Inc.

## 746 References

- 747 1. Alonso, A. *et al.* Simple risk model predicts incidence of atrial fibrillation in a racially  
748 and geographically diverse population: the CHARGE-AF consortium. *J Am Heart*  
749 *Assoc* **2**, e000102 (2013).
- 750 2. Cheng, S. *et al.* Long-term outcomes in individuals with prolonged PR interval or first-  
751 degree atrioventricular block. *JAMA* **301**, 2571-7 (2009).
- 752 3. Rasmussen, P.V. *et al.* Electrocardiographic PR Interval Duration and Cardiovascular  
753 Risk: Results From the Copenhagen ECG Study. *Can J Cardiol* **33**, 674-681 (2017).
- 754 4. Butler, A.M. *et al.* Novel loci associated with PR interval in a genome-wide association  
755 study of 10 African American cohorts. *Circ Cardiovasc Genet* **5**, 639-46 (2012).
- 756 5. Chambers, J.C. *et al.* Genetic variation in SCN10A influences cardiac conduction. *Nat*  
757 *Genet* **42**, 149-52 (2010).
- 758 6. Holm, H. *et al.* Several common variants modulate heart rate, PR interval and QRS  
759 duration. *Nat Genet* **42**, 117-22 (2010).
- 760 7. Hong, K.W. *et al.* Identification of three novel genetic variations associated with  
761 electrocardiographic traits (QRS duration and PR interval) in East Asians. *Hum Mol*  
762 *Genet* **23**, 6659-67 (2014).
- 763 8. Pfeufer, A. *et al.* Genome-wide association study of PR interval. *Nat Genet* **42**, 153-9  
764 (2010).
- 765 9. Sano, M. *et al.* Genome-wide association study of electrocardiographic parameters  
766 identifies a new association for PR interval and confirms previously reported  
767 associations. *Hum Mol Genet* **23**, 6668-76 (2014).
- 768 10. van Setten, J. *et al.* PR interval genome-wide association meta-analysis identifies 50  
769 loci associated with atrial and atrioventricular electrical activity. *Nat Commun* **9**, 2904  
770 (2018).
- 771 11. Verweij, N. *et al.* Genetic determinants of P wave duration and PR segment. *Circ*  
772 *Cardiovasc Genet* **7**, 475-81 (2014).
- 773 12. van Setten, J. *et al.* Genome-wide association meta-analysis of 30,000 samples  
774 identifies seven novel loci for quantitative ECG traits. *Eur J Hum Genet* (2019).
- 775 13. Lin, H. *et al.* Common and Rare Coding Genetic Variation Underlying the  
776 Electrocardiographic PR Interval. *Circ Genom Precis Med* **11**, e002037 (2018).
- 777 14. Genomes Project, C. *et al.* A global reference for human genetic variation. *Nature* **526**,  
778 68-74 (2015).
- 779 15. Liu, Y. *et al.* SPSB3 targets SNAIL for degradation in GSK-3beta phosphorylation-  
780 dependent manner and regulates metastasis. *Oncogene* **37**, 768-776 (2018).
- 781 16. Holm, H. *et al.* A rare variant in MYH6 is associated with high risk of sick sinus  
782 syndrome. *Nat Genet* **43**, 316-20 (2011).
- 783 17. Thorolfsson, R.B. *et al.* A Missense Variant in PLEC Increases Risk of Atrial  
784 Fibrillation. *J Am Coll Cardiol* **70**, 2157-2168 (2017).
- 785 18. Consortium, G.T. *et al.* Genetic effects on gene expression across human tissues.  
786 *Nature* **550**, 204-213 (2017).
- 787 19. Schmitt, A.D. *et al.* A Compendium of Chromatin Contact Maps Reveals Spatially  
788 Active Regions in the Human Genome. *Cell Rep* **17**, 2042-2059 (2016).
- 789 20. Pers, T.H. *et al.* Biological interpretation of genome-wide association studies using  
790 predicted gene functions. *Nat Commun* **6**, 5890 (2015).
- 791 21. Sudlow, C. *et al.* UK biobank: an open access resource for identifying the causes of a  
792 wide range of complex diseases of middle and old age. *PLoS Med* **12**, e1001779 (2015).

- 793 22. Bermudez-Jimenez, F.J. *et al.* Novel Desmin Mutation p.Glu401Asp Impairs Filament  
794 Formation, Disrupts Cell Membrane Integrity, and Causes Severe Arrhythmogenic Left  
795 Ventricular Cardiomyopathy/Dysplasia. *Circulation* **137**, 1595-1610 (2018).
- 796 23. Norgett, E.E. *et al.* Recessive mutation in desmoplakin disrupts desmoplakin-  
797 intermediate filament interactions and causes dilated cardiomyopathy, woolly hair and  
798 keratoderma. *Hum Mol Genet* **9**, 2761-6 (2000).
- 799 24. Rampazzo, A. *et al.* Mutation in human desmoplakin domain binding to plakoglobin  
800 causes a dominant form of arrhythmogenic right ventricular cardiomyopathy. *Am J*  
801 *Hum Genet* **71**, 1200-6 (2002).
- 802 25. Taylor, M.R. *et al.* Prevalence of desmin mutations in dilated cardiomyopathy.  
803 *Circulation* **115**, 1244-51 (2007).
- 804 26. van Tintelen, J.P. *et al.* Severe cardiac phenotype with right ventricular predominance  
805 in a large cohort of patients with a single missense mutation in the DES gene. *Heart*  
806 *Rhythm* **6**, 1574-83 (2009).
- 807 27. Glukhov, A.V. *et al.* Conduction remodeling in human end-stage nonischemic left  
808 ventricular cardiomyopathy. *Circulation* **125**, 1835-47 (2012).
- 809 28. Gomes, J. *et al.* Electrophysiological abnormalities precede overt structural changes in  
810 arrhythmogenic right ventricular cardiomyopathy due to mutations in desmoplakin-A  
811 combined murine and human study. *Eur Heart J* **33**, 1942-53 (2012).
- 812 29. Fukuzawa, A. *et al.* Interactions with titin and myomesin target obscurin and obscurin-  
813 like 1 to the M-band: implications for hereditary myopathies. *J Cell Sci* **121**, 1841-51  
814 (2008).
- 815 30. Cheng, H. *et al.* Loss of enigma homolog protein results in dilated cardiomyopathy.  
816 *Circ Res* **107**, 348-56 (2010).
- 817 31. Hojayeve, B., Rothermel, B.A., Gillette, T.G. & Hill, J.A. FHL2 binds calcineurin and  
818 represses pathological cardiac growth. *Mol Cell Biol* **32**, 4025-34 (2012).
- 819 32. Friedrich, F.W. *et al.* FHL2 expression and variants in hypertrophic cardiomyopathy.  
820 *Basic Res Cardiol* **109**, 451 (2014).
- 821 33. Dierck, F. *et al.* The novel cardiac z-disc protein CEFIP regulates cardiomyocyte  
822 hypertrophy by modulating calcineurin signaling. *J Biol Chem* **292**, 15180-15191  
823 (2017).
- 824 34. Duhme, N. *et al.* Altered HCN4 channel C-linker interaction is associated with familial  
825 tachycardia-bradycardia syndrome and atrial fibrillation. *Eur Heart J* **34**, 2768-75  
826 (2013).
- 827 35. Milanese, R., Baruscotti, M., Gnecci-Ruscone, T. & DiFrancesco, D. Familial sinus  
828 bradycardia associated with a mutation in the cardiac pacemaker channel. *N Engl J Med*  
829 **354**, 151-7 (2006).
- 830 36. Milano, A. *et al.* HCN4 mutations in multiple families with bradycardia and left  
831 ventricular noncompaction cardiomyopathy. *J Am Coll Cardiol* **64**, 745-56 (2014).
- 832 37. Priori, S.G. *et al.* Mutations in the cardiac ryanodine receptor gene (hRyR2) underlie  
833 catecholaminergic polymorphic ventricular tachycardia. *Circulation* **103**, 196-200  
834 (2001).
- 835 38. Kubo, T. *et al.* Cloning, sequencing and expression of complementary DNA encoding  
836 the muscarinic acetylcholine receptor. *Nature* **323**, 411-6 (1986).
- 837 39. Kurachi, Y. G protein regulation of cardiac muscarinic potassium channel. *Am J*  
838 *Physiol* **269**, C821-30 (1995).
- 839 40. Aistrup, G.L. *et al.* Targeted G-protein inhibition as a novel approach to decrease vagal  
840 atrial fibrillation by selective parasympathetic attenuation. *Cardiovasc Res* **83**, 481-92  
841 (2009).

- 842 41. Dobrev, D. *et al.* Molecular basis of downregulation of G-protein-coupled inward  
843 rectifying K(+) current (I(K,ACh) in chronic human atrial fibrillation: decrease in  
844 GIRK4 mRNA correlates with reduced I(K,ACh) and muscarinic receptor-mediated  
845 shortening of action potentials. *Circulation* **104**, 2551-7 (2001).
- 846 42. Stavrakis, S. *et al.* Activating autoantibodies to the beta-1 adrenergic and m2  
847 muscarinic receptors facilitate atrial fibrillation in patients with Graves'  
848 hyperthyroidism. *J Am Coll Cardiol* **54**, 1309-16 (2009).
- 849 43. Winkler, T.W. *et al.* Quality control and conduct of genome-wide association meta-  
850 analyses. *Nat Protoc* **9**, 1192-212 (2014).
- 851 44. Willer, C.J., Li, Y. & Abecasis, G.R. METAL: fast and efficient meta-analysis of  
852 genomewide association scans. *Bioinformatics* **26**, 2190-1 (2010).
- 853 45. Higgins, J.P., Thompson, S.G., Deeks, J.J. & Altman, D.G. Measuring inconsistency in  
854 meta-analyses. *BMJ* **327**, 557-60 (2003).
- 855 46. Pruim, R.J. *et al.* LocusZoom: regional visualization of genome-wide association scan  
856 results. *Bioinformatics* **26**, 2336-7 (2010).
- 857 47. Yang, J., Lee, S.H., Goddard, M.E. & Visscher, P.M. GCTA: a tool for genome-wide  
858 complex trait analysis. *Am J Hum Genet* **88**, 76-82 (2011).
- 859 48. Loh, P.R. *et al.* Contrasting genetic architectures of schizophrenia and other complex  
860 diseases using fast variance-components analysis. *Nat Genet* **47**, 1385-92 (2015).
- 861 49. McLaren, W. *et al.* The Ensembl Variant Effect Predictor. *Genome Biol* **17**, 122 (2016).
- 862 50. Kumar, P., Henikoff, S. & Ng, P.C. Predicting the effects of coding non-synonymous  
863 variants on protein function using the SIFT algorithm. *Nat Protoc* **4**, 1073-81 (2009).
- 864 51. Adzhubei, I., Jordan, D.M. & Sunyaev, S.R. Predicting functional effect of human  
865 missense mutations using PolyPhen-2. *Curr Protoc Hum Genet* **Chapter 7**, Unit7 20  
866 (2013).
- 867 52. Bernstein, B.E. *et al.* The NIH Roadmap Epigenomics Mapping Consortium. *Nat*  
868 *Biotechnol* **28**, 1045-8 (2010).
- 869 53. Ward, L.D. & Kellis, M. HaploReg: a resource for exploring chromatin states,  
870 conservation, and regulatory motif alterations within sets of genetically linked variants.  
871 *Nucleic Acids Res* **40**, D930-4 (2012).
- 872 54. Barbeira, A.N. *et al.* Exploring the phenotypic consequences of tissue specific gene  
873 expression variation inferred from GWAS summary statistics. *Nat Commun* **9**, 1825  
874 (2018).
- 875 55. Iotchkova, V. *et al.* GARFIELD classifies disease-relevant genomic features through  
876 integration of functional annotations with association signals. *Nat Genet* **51**, 343-353  
877 (2019).
- 878 56. Consortium, E.P. An integrated encyclopedia of DNA elements in the human genome.  
879 *Nature* **489**, 57-74 (2012).
- 880 57. Buniello, A. *et al.* The NHGRI-EBI GWAS Catalog of published genome-wide  
881 association studies, targeted arrays and summary statistics 2019. *Nucleic Acids Res* **47**,  
882 D1005-D1012 (2019).
- 883 58. Staley, J.R. *et al.* PhenoScanner: a database of human genotype-phenotype  
884 associations. *Bioinformatics* **32**, 3207-3209 (2016).
- 885 59. Nielsen, J.B. *et al.* Genome-wide Study of Atrial Fibrillation Identifies Seven Risk Loci  
886 and Highlights Biological Pathways and Regulatory Elements Involved in Cardiac  
887 Development. *Am J Hum Genet* **102**, 103-115 (2018).
- 888 60. Roselli, C. *et al.* Multi-ethnic genome-wide association study for atrial fibrillation. *Nat*  
889 *Genet* **50**, 1225-1233 (2018).
- 890 61. Purcell, S. *et al.* PLINK: a tool set for whole-genome association and population-based  
891 linkage analyses. *Am J Hum Genet* **81**, 559-75 (2007).
